1 **Phylogenomics, biogeography, and trait evolution of the Boletaceae (Boletales,**  
2 **Agaricomycetes, Basidiomycota)**

3 Keaton Tremble<sup>a\*</sup>, Terry Henkel<sup>b</sup>, Alexander Bradshaw<sup>a</sup>, Colin Domnauer<sup>a</sup>, Lyda  
4 Brown<sup>a</sup>, Lê Xuân Thám<sup>c</sup>, Guliana Furci<sup>d</sup>, Cathie Aime<sup>e</sup>, Jean-Marc Moncalvo<sup>f</sup>, Bryn  
5 Dentinger<sup>a\*</sup>

6 <sup>a</sup>Natural History Museum of Utah and School of Biological Sciences, University of  
7 Utah, Salt Lake City, Utah 84108

8 <sup>b</sup>Department of Biological Sciences, California State Polytechnic University, Humboldt,  
9 Arcata, California 95521

10 <sup>c</sup>Van Lang University, Ho Chi Minh City, Viet Nam

11 <sup>d</sup>Fungi Foundation, Brooklyn, New York 11222

12 <sup>e</sup>Department of Botany and Plant Pathology, Purdue University, West Lafayette,  
13 Indiana 47907

14 <sup>f</sup>Department of Natural History, Royal Ontario Museum & Department of Ecology and  
15 Evolutionary Biology, University of Toronto, Toronto M5S 2C6, Canada

16 **ABSTRACT**

17 The species-rich porcini mushroom family Boletaceae is a widespread and well-known  
18 group of ectomycorrhizal (ECM) mushroom-forming fungi that has eluded intrafamilial  
19 phylogenetic resolution despite many attempts using morphological traits and multi-  
20 locus molecular datasets. In this study, we present a genome-wide molecular dataset of  
21 1764 single-copy gene families from a global sampling of 418 Boletaceae specimens.  
22 The resulting phylogenetic analysis has strong statistical support for most branches of  
23 the tree, including the first statistically robust backbone. The enigmatic *Phylloboletellus*  
24 *chloephorus* from non-ECM Argentinian subtropical forests was recovered as an early  
25 diverging lineage within the Boletaceae. Time-calibrated branch lengths estimate that

26 the family first arose in the early- to mid-Cretaceous and underwent a rapid radiation in  
27 the Eocene, possibly when the ECM nutritional mode arose with the emergence and  
28 diversification of ECM angiosperms. Biogeographic reconstructions reveal a complex  
29 history of vicariance and episodic long-distance dispersal correlated with historical  
30 geologic events, including Gondwanan origins and cladogenesis patterns that parallel its  
31 fragmentation. Ancestral state reconstruction of sporocarp morphological traits predicts  
32 that the ancestor of the Boletaceae was lamellate with ornamented basidiospores,  
33 contrary to most contemporary “bolete” morphologies. Transition rates indicated that  
34 the lamellate hymenophore and sequestrate sporocarp are reversible traits. Together,  
35 this study represents the most comprehensively sampled, data-rich molecular phylogeny  
36 of the Boletaceae to date, enabling robust inferences of trait evolution and biogeography  
37 in the group.

38 **KEYWORDS:** phylogenomics; Boletaceae; porcini; evolutionary radiation; Gondwana

### 39 **INTRODUCTION**

40 Evolutionary radiations result from short bursts of relatively rapid diversification and  
41 demonstrate the creative power of evolution. Adaptive and non-adaptive radiations may  
42 be the most common macroevolutionary patterns and are fundamental to the origins of  
43 biodiversity (Simoes et al. 2016; Futuyma 1998; Schluter and McPeck 2000). Yet, the  
44 causes of evolutionary radiations are poorly known for most groups, as most studies  
45 have focused on animals and plants (Soulebeau et al. 2015). The other major  
46 multicellular eukaryotic group, the Fungi, have largely been neglected (Varga et al.  
47 2019).

48 The porcini mushroom family Boletaceae (FIG. 1) is an example of an  
49 evolutionary radiation in Fungi (Bruns et al. 1992). The family is exceptionally diverse  
50 (>2000 currently accepted species) and globally distributed, but poorly documented for

51 many regions. Yet, boletoid fungi are prevalent ectomycorrhizal (ECM) mutualists in  
52 ecosystems dominated by ECM plants (Peay et al. 2010) and at least eight species are  
53 traded globally as wild-collected edible mushrooms (Arora 2008; Sitta and Floriani  
54 2008; Dentinger et al. 2010; Dentinger and Suz 2014). Despite their conspicuous  
55 sporocarps, ecological dominance, and cultural importance, new species of Boletaceae  
56 are regularly described from poorly explored habitats around the globe (e.g. Halling et  
57 al. 2006, 2023; Fulgenzi et al. 2007, 2008, 2010; Neves et al. 2010; Husbands et al.  
58 2013; Castellano et al. 2016; Chakraborty et al. 2015; Das et al. 2015, 2016; Henkel et  
59 al. 2016; Magnago et al. 2017). New species have also recently been described from  
60 wild-collected foods in markets (e.g. Das et al. 2015; Dentinger and Suz 2014; Halling  
61 et al. 2014). While new Boletaceae species are increasingly understood in a global  
62 phylogenetic context, shedding light on their origin, diversification, and migration, over  
63 20 years of molecular phylogenetic studies using legacy loci have made little progress  
64 towards resolving the deepest nodes (“backbones”) in Boletaceae phylogenies  
65 (Grubisha et al. 2001; Binder and Hibbett 2006; Drehmel et al. 2008; Dentinger et al.  
66 2010; Nuhn et al. 2016; Wu et al. 2014).

67 A prominent consequence of this lack of phylogenetic resolution is the recent  
68 explosion of new generic names to accommodate newly discovered species, or species  
69 that are included in molecular phylogenetic analyses for the first time and recovered on  
70 long branches with no supported affinity to existing named genera (e.g., Castellano et  
71 al. 2016; Henkel et al. 2016; Badou et al. 2022; Halling et al. 2023). Few of these  
72 studies have followed recommended best practices for naming new genera (Vellinga et  
73 al. 2015). Moreover, many of these new Boletaceae genera are monotypic and require  
74 identification to recognize, an impractical solution to the problem. Taken together, the

75 current situation is perhaps best described as a quagmire of nomenclatural, taxonomic,  
76 ecological, and evolutionary speculation.

77       Beyond taxonomic concerns, the Boletaceae presents a unique system to  
78 identify the genetic mechanisms that contribute to diversification. The Boletaceae  
79 appear to have undergone an early evolutionary radiation between 60-100 mya (Bruns  
80 and Palmer 1989; Binder et al. 2006; Dentinger et al. 2010; Wu et al. 2014, 2016; Sato  
81 et al. 2019). This early radiation has been correlated with the convergent evolution of  
82 morphological traits, such as the lamellate hymenophore and gasteromycetization  
83 (Castellano et al. 2016), suggesting that emergence of morphological diversity is  
84 constrained by relatively few changes in developmental pathways.

85       Many factors have contributed to difficulties in generating robust phylogenetic  
86 reconstructions for the Boletaceae. While phenomena such as incomplete lineage  
87 sorting and hybridization may obscure historical phylogenetic signal, previous datasets  
88 for the Boletaceae had patchy taxonomic and geographic sampling. These factors  
89 impact accurate phylogenetic reconstruction, possibly exacerbated by the  
90 aforementioned rapid radiation event (Bruns et al. 1992; Sato et al. 2017). Without a  
91 phylogeny that is based on globally representative taxon sampling and statistically well-  
92 supported resolution at all depths of the tree, it is impossible to name, classify, and  
93 understand evolutionary history in the Boletaceae. For example, only a few recent  
94 studies have included representatives of the exceptionally rich Australian boletoid fungi  
95 (Halling, Fechner, et al. 2015, 2023; Halling, Nuhn, et al. 2012). Boletoid fungi from  
96 the Neotropics and Afrotropics are rarely represented in family-level analyses despite  
97 their exceptional species richness (e.g. Heinemann 1951; Henkel et al. 2012).

98       Recent fieldwork has resulted in many new collections from under-sampled  
99 regions (B. Dentinger, T. Henkel, R. Halling; unpublished data), and these are now

100 available to include in phylogenetic datasets aiming to achieve the first globally  
101 representative sampling of the Boletaceae. Collections-based phylogenomics is also  
102 effective for resolving ancient relationships among mushroom-forming fungi (Dentinger  
103 et al. 2015; Liimatainen et al. 2021; Tremble et al. 2020). However, no one has yet  
104 applied these methods to the Boletaceae. Moreover, whole genome sequencing of  
105 mushroom forming fungi provides opportunities to go beyond phylogenetic  
106 reconstruction. For example, whole genome sequencing can exceed legacy loci in  
107 identifying population processes that generate biodiversity (e.g. Tremble et al. 2022).

108 For this study, we generated the first phylogeny of the Boletaceae that utilized a  
109 very large molecular dataset comprised of 1764 genome-wide loci from 418 taxa across  
110 the family. Specimens were collected in many tropical and temperate geographic  
111 regions. To obtain broad geographic and taxon coverage we included type fungarium  
112 specimens and recent new collections. We utilized specimens from previously under-  
113 sampled regions including tropical Africa, southern South America, lowland tropical  
114 South America, and Australia. Type species were sampled to facilitate future taxonomic  
115 revisions of genera. Using our highly resolved genome-based phylogeny, we also  
116 performed the first inclusive biogeographic reconstruction of the Boletaceae and  
117 assessed morphological trait evolution. Overall, we provide new insights into the broad  
118 patterns of evolution of this enigmatic fungal group.

## 119 **MATERIALS AND METHODS**

120 *Sampling.*—Taxon selection focused on obtaining representatives of all currently  
121 accepted genera, selecting type species whenever possible. Because the current  
122 understanding of genera is incomplete and rapidly changing, we could not include  
123 representatives of all currently accepted genera that were published during the course of  
124 this study. Specimens from geographic regions unrepresented in prior studies were also

125 included. A total of 418 Boletaceae specimens were gathered from a global distribution  
126 using collections made by the authors, those borrowed from four institutions, and  
127 donations from citizen scientists (SUPPLEMENTAL TABLE 1). In addition, we  
128 utilized genome data publicly available from the JGI MycoCosm Portal (Grigoriev et al.  
129 2014) for *Boletus coccyginus*, *B. reticuloceps*, *Butyriboletus roseoflavus*, *Chiuia virens*,  
130 *Lanmaoa asiatica*, and *Imleria badia* (Miyachi et al. 2020, Wu et al. 2022, Kohler et  
131 al. 2015). *Paxillus involutus*, *Paxillus adelphus*, and *Hydnomerulius pinastri* genomes  
132 from JGI were used for outgroups (Kohler et al. 2015).

133 **DNA extraction and sequencing.** —Genomic DNA was extracted in one of three ways.  
134 1) 10 mg of hymenophore tissue from each specimen was homogenized in 2.0 ml  
135 screw-cap tubes containing a single 3.0 mm and 8 x 1.5 mm stainless steel beads using a  
136 BeadBug™ microtube homogenizer (Sigma-Aldrich, #Z763713) for 120 seconds at a  
137 speed setting of 3500 rpm. After physical disruption, DNA was extracted using the  
138 Monarch® Genomic DNA Purification Kit (New England Biolabs, Massachusetts;  
139 #T3010) with the Monarch® gDNA Tissue Lysis Buffer (#T3011) using double the  
140 volume of lysis buffer, one hour lysis incubation at 56 C , and 550 µl of wash buffer  
141 during each of the wash steps. 2) an in-house 96-well plate protocol where tissue is  
142 physically homogenized, as above, after which 1000 µL of lysis buffer (1% sodium  
143 dodecyl sulfate, 10 mM Tris, 10 mM EDTA, 5mM NaCl, 50mM dithiothreitol, pH 8.0)  
144 is added. To this solution is added 4 µL of RNase A (20 mg/mL), the solution is  
145 vortexed, and then incubated at 37 C for 10 min. Next, 10 µL of proteinase K (20  
146 mg/mL) is added, the solution vortexed, and then incubated at 56 C overnight on an  
147 Eppendorf ThermoMixer® with agitation at 400 rpm. After lysis, the tubes are  
148 centrifuged at max speed (17,000 x g) to pellet the cellular debris. 700 µL of  
149 supernatant is removed to a new 1.7 mL microcentrifuge tube with hinged cap to which

150 162.5  $\mu$ L 3.0 M potassium acetate (pH 5.5) is added. The solution is mixed briefly and  
151 then put on ice for five min, followed by a second centrifugation, as above. Avoiding  
152 the pellet, the supernatant is removed to a well of a 96-well 10  $\mu$ M filter plate  
153 (Enzymax, #EZ96FTP) set in a 2 mL MASTERBLOCK® collection plate (Grainer,  
154 #780271). Filtration is achieved through centrifugation at 1500 x g for 2 min. The flow-  
155 through is transferred to a new 1.7 ml microcentrifuge tube with hinged cap and  
156 centrifuged, as above. Without disturbing the pellet, the supernatant is removed to a  
157 new 2.0 mL microcentrifuge tube with hinged cap and 1000  $\mu$ L of binding buffer (5M  
158 guanidium hydrochloride, 40% isopropanol) is added and the solution homogenized by  
159 pipetting. The binding solution is then transferred to a well of a 96-well long-tip  
160 AcroPrep™ Plate (PALL, #8133) that was pre-conditioned by pulling 400  $\mu$ l Tris-HCl  
161 buffer (pH 8.0) through using a vacuum manifold. DNA is bound to the filter by  
162 centrifugation at 1500 x g for 2 min or using a vacuum manifold. The filter is washed  
163 twice with 700  $\mu$ l of wash buffer (20% solution of 80mM NaCl, 8mM Tris-HCl, pH 7.5  
164 and 80% ethanol) using centrifugation or vacuum, and then the filter is dried with  
165 centrifugation at 1500 x g for 15 min. Residual ethanol is removed by incubating the  
166 filter plate at room temperature for 30 min. To elute the DNA from the filter, 50  $\mu$ l of  
167 elution buffer (0.1x Tris-EDTA buffer, pH 8-9) prewarmed to 60 C is added directly to  
168 the filter, incubated for 2 min at room temperature, and eluted into a new 2 ml  
169 MASTERBLOCK® collection plate with centrifugation at 1500 rpm for 2 min. The  
170 elution step is repeated once. 3) a phenol-chloroform DNA extraction protocol where  
171 tissue is physically homogenized, as above, and lysed using the Tissue Lysis buffer  
172 from the Monarch® Genomic DNA Purification Kit (NEB, #T3010S) with double the  
173 volume of lysis buffer and a 1 h incubation at 56 C. Then, total lysate was placed in  
174 Phase Lock Gel™ Light tubes (QuantaBio, #2302820) along with an equal volume of

175 OmniPur® Phenol:Chloroform:Isoamyl Alcohol (25:24:1, TE-saturated, pH 8.0)  
176 solution (MilliporeSigma, Calibiochem #D05686) and then mixed by gentle inversion  
177 for 15 minutes using a fixed speed tube rotator. After mixing, tubes were centrifuged at  
178 maximum speed (14,000 x g) for 10 minutes, then the aqueous (top) layer was  
179 transferred to a new phase-lock gel tube and the process repeated. DNA precipitation of  
180 the aqueous phase was performed by adding 5M NaCl to a final concentration of 0.3M  
181 and two volumes of room temperature absolute ethanol, inverting the tubes 20x for  
182 thorough mixing followed by an overnight incubation at -20C. DNA was pelleted by  
183 centrifugation at 14,000 x g for 5 min, washed twice with freshly prepared, ice cold  
184 70% ethanol, air-dried for 15 min at room temperature, and then resuspended in 150 µl  
185 of Elution Buffer from the Monarch® Genomic DNA kit.

186 DNA extract quality was assessed for quality using a NanoDrop 1000 (Thermo  
187 Scientific) and fragment integrity using agarose gel electrophoresis. Genomic DNAs  
188 were sequenced using a combination of paired-end sequencing on the Illumina MiSeq,  
189 HiSeq, and Novaseq sequencing platforms (SUPPLEMENTARY TABLE 2). All raw  
190 reads and whole genome assemblies are deposited in the Short Read Archive  
191 (Bioproject#PRJNA1022813).

192 ***Genome assembly, ortholog extraction and phylogenetic analysis.*** —Raw sequencing  
193 reads were quality-filtered and adapter-trimmed using fastP v0.20.1 (Chen et al. 2018)  
194 with default settings. Genome assemblies were produced from quality-filtered reads  
195 using SPAdes v3.15.0 (Bankevich et al. 2012) with five k-mer values  
196 (k=77,85,99,111,127). From each genome, we identified 1764 highly conserved single  
197 copy orthologs using BUSCO with the “basidiomycota odb 10” dataset. Orthogroups  
198 that were present in less than 75% of taxa and taxa with less than 20% ortholog  
199 recovery were removed. Retained orthologs were aligned using MAFFT v7.397 (Katoh,



200 Rozewicki, and Yamada 2017) with the “L-INS-I” algorithm, and maximum- likelihood  
201 gene-trees were inferred using IQ-TREE v2.0.3 (Minh et al. 2020) with automatic  
202 model selection in ModelFinder (Kalyaanamoorthy et al. 2017) and ultrafast  
203 bootstrapping (BS, (Hoang et al. 2018)) with 1000 replicates. A summary coalescent  
204 species tree was constructed from the resulting gene trees using hybrid- ASTRAL  
205 implemented in ASTER (v1.15) (Zhang and Mirarab 2022). Branch lengths in  
206 substitutions/site were estimated under maximum likelihood on the species tree using  
207 the “-te” option in IQ-TREE, with a partitioned concatenated alignment of all BUSCO  
208 genes used in species tree construction.

209 **Gene tree comparison.** —To evaluate discordance, individual gene trees were  
210 compared using six metrics calculated in SortaDate (average bootstrap support,  
211 clocklike branch lengths, tree length; Smith et al. 2018) and the R package ‘TreeDist’  
212 (generalized Robinson-Foulds metrics; Smith 2020, 2022). In addition to data matrix  
213 summaries (number of taxa, alignment length), Pearson’s correlations were calculated  
214 to determine relationships between metrics.

215 **Divergence dating.** —A timetree was inferred by applying the RelTime method  
216 (Tamura et al. 2012, 2018) conducted in MEGA11 (Stecher et al. 2020, Tamura et al.  
217 2021) to the species tree with ML-estimated branch lengths. To reduce computational  
218 burden, time-calibrated branch lengths were calculated using the Maximum Likelihood  
219 (ML) method and the General Time Reversible substitution model (Nei and Kumar  
220 2000) from two sets of 100 genes: 1) the top 100 genes with well-supported clock-like  
221 trees determined using SortaDate (Smith et al. 2018) and 2) the top 100 genes with the  
222 smallest generalized Robinson-Foulds (‘gRF’) distances to the species tree calculated  
223 using the R package ‘TreeDist.’ The timetree was computed using two sets of  
224 calibration constraints. The first included two calibrations: 1) a secondary calibration

225 for the stem age of the Boletaceae from 50-150 mya (Varga et al. 2019, Wu et al. 2022)  
226 and 2) a secondary calibration for the stem age of *Boletus edulis* from 5-13 mya  
227 (Tremble et al. 2022). The second set included the former two calibrations plus four of  
228 the five internal calibrations using the highly supported core shifts from Varga et al.  
229 (2019). Because many of the clades in Varga et al. were incongruent with our topology,  
230 calibrations were selected using the most inclusive node, except for *Aureoboletus* which  
231 could not be reconciled with our results. The Tao et al. (2020) method was used to set  
232 minimum and maximum time boundaries on nodes for which calibration densities were  
233 provided, and to compute confidence intervals. Outgroup node ages were not estimated  
234 because the RelTime method uses evolutionary rates from the ingroup to calculate  
235 divergence times and does not assume that evolutionary rates in the ingroup clade apply  
236 to the outgroup.

237 **Ancestral state reconstruction.** — Morphological/macrochemical traits were coded  
238 according to original descriptions and verified with microscopic analysis when traits  
239 were ambiguous. Four traits were scored as binary or multistate characters: 1)  
240 hymenophore anatomy (straight tubes = 0, tubular with cross walls = 1, lamellate = 2,  
241 not applicable = 3), 2) color changes from damage (none = 0, blue = 1, black/brown = 2,  
242 not applicable = 3), and sporocarp morphology (pileate-stipitate with exposed  
243 hymenophore = 0, secotioid = 1, gasteroid = 2), 4) spore ornamentation (smooth = 0,  
244 not smooth = 1) (SUPPLEMENTARY TABLE 4). The state of hymenophore anatomy  
245 defined as “tubular with cross walls” refers to hymenophores that have tubes at two or  
246 more lengths, giving the appearance of a primary long tube with shorter internal cross-  
247 walls. A “not applicable” category was scored for hymenophore anatomy and color  
248 changes from damage to accommodate secotioid/gasteroid taxa and taxa with unknown  
249 changes, respectively. An alternative coding scheme for sporocarp morphology was also

250 used in an attempt to disentangle the transition between pileate-stipitate and gasteroid  
251 morphologies from the loss of ballistospory. In this alternative coding scheme, two  
252 binary traits were scored: stipe (present = 0, absent = 1) and ballistospory (no = 0, yes  
253 =1). Ancestral state reconstruction of the root node of the Boletaceae was implemented  
254 with BayesTraits V4.0.0, using the MCMC approach over 1,100,000 iterations, with a  
255 “burn-in” of 100,000 iterations (Mead and Pagel 2022). Model convergence was  
256 assessed with the program Tracer (v1.7.1, Rambaut et al. 2018), and determined as an  
257 effective sample size (ESS) of >300 for all variables.

258 **Ancestral Range Reconstruction.** —Numerous analytical methods for reconstructing  
259 historical biogeography exist, accounting for processes such as vicariance, dispersal,  
260 and cladogenesis (Ronquist 1994; Ree et al. 2005; Landis et al. 2013). To account for  
261 these macroevolutionary processes in our ancestral state reconstruction in the  
262 Boletaceae, we utilized BioGeography with Bayesian (and likelihood) Evolutionary  
263 Analysis with R Scripts (“BioGeoBEARS”; Matzke 2018). Samples were coded in two  
264 ways: 1) Paleotropical (consisting of Africa and tropical Asia), Neotropical (South and  
265 Central America), South Temperate (temperate Australia and New Zealand), or North  
266 Temperate (North America, Europe, northern temperate Asia), and 2) by these floristic  
267 regions: Holarctic including Central America, Neotropical, Chilean-Patagonian,  
268 African, Indo-Malesian, Australian, and Novo-Zealandic (Liu et al 2023)  
269 (SUPPLEMENTARY TABLE 3). Central America was combined with the Holarctic  
270 region as Central American ECM fungi are mostly derived from North American  
271 ancestors (Halling 1996). The most likely model was chosen according to AIC and  
272 weighted AIC score calculated in BioGeoBEARS.

273 **RESULTS**

274 **DNA sequencing, genome assembly, and ortholog extraction.** —Whole genome  
275 sequencing of 418 specimens resulted in 13,794,532 paired-end reads per specimen on  
276 average (SUPPLEMENTAL TABLE 2). On average, genome assemblies possessed an  
277 assembly N50 of 12.9 Kbp (thousand base-pairs), total assembly length of 61.6 Mbp  
278 (million base-pairs), 53,972 scaffolds, and a BUSCO score of 74.7%. 34 of 418  
279 specimens possessed BUSCO scores less than 20%, and 175 specimens possessed  
280 BUSCO scores greater than 90% (SUPPLEMENTARY TABLE 2). After removing  
281 specimens with poor BUSCO recovery, our final dataset included 383 Boletaceae  
282 specimens, three outgroup taxa, and 1461 single-copy orthologs.

283 **Phylogenetic analysis.** — The summary coalescent tree resolved most nodes with  
284 strong support (FIG. 2). Many of the groups recovered are consistent with previous  
285 studies but now with statistical support (Dentinger et al. 2010, Nuhn et al. 2013, Wu et  
286 al. 2014). We recognized the six subfamilies following previous authors (Wu et al.  
287 2014), which led us to formally recognize two new subfamilies (Tremble et al. 2023).  
288 Many of the currently accepted genera that are not mono- or oligo-typic are  
289 polyphyletic. One notable pattern is the phylogenetic placements of the endemic  
290 Chilean taxa, all of which were recovered as ancient lineages of similar age within four  
291 of the subfamilies: *Gastroboletus valdivianus* in Xerocomoidae, *Boletus loyita* in  
292 Austroboletoidae, *Boletus loyo* in Suillelloidae, and *Boletus putidus* in Boletoidae.

293 **Gene tree comparison.** —Average bootstrap support had the highest positive  
294 correlation with the number of taxa present (Pearson's coefficient = 0.76), and weak to  
295 moderate negative correlations with alignment length (Pearson's coefficient = -0.17),  
296 clocklike branch lengths (Pearson's coefficient = -0.13), and total tree length (Pearson's  
297 coefficient = -0.20). Generalized Robinson-Foulds distances were weakly to moderately  
298 negatively correlated with number of taxa (Pearson's coefficient = -0.33), total length

299 (Pearson's coefficient = -0.30), and clocklike branch lengths (Pearson's coefficient = -  
300 0.13), and weakly to moderately positively correlated with alignment length (Pearson's  
301 coefficient= 0.29) and average bootstrap support (Pearson's coefficient = 0.17).

302 Clocklike branch lengths and total tree length were weakly positively correlated  
303 (Pearson's coefficient= 0.15).

304 ***Divergence dating.*** — Using the two- and six-calibration sets the following ages were  
305 estimated (FIGS. 2, 3). Stem ages for the Boletaceae were estimated at 138-139 mya  
306 and 77 mya. The crown age of the Boletaceae and origin of Chalciporoideae was  
307 estimated at 103-105 mya and 63 mya (49-77 mya). The stem age of the  
308 Phylloboletelloideae was estimated at 83-87 mya and 58 mya (49-77 mya)., The  
309 radiation of the remaining subfamilies was estimated to have occurred between 61 and  
310 51 mya. The origin of *Boletus* sensu stricto (i.e. “true porcini”) was estimated at 38 mya  
311 and 35 mya (29-42 mya), and its diversification was estimated at 29-30 mya and 26 mya  
312 (20-34 mya).

313 ***Ancestral state reconstruction.*** —Ancestral state reconstruction with Bayestraits  
314 achieved strong convergence (all variables with ESS > 300) and recovered the most  
315 likely ancestor of the Boletaceae to have a pileate-stipitate, lamellate sporocarp with  
316 ornamented basidiospores. The highest transition rates were observed in changes from  
317 secotioid to gasteroid and from secotioid to pileate-stipitate morphologies. Secotioid  
318 morphology appeared to be a relatively transient evolutionary state (TABLE 1). High  
319 transition rates were also found to occur from gasteroid to pileate-stipitate morphology,  
320 supporting evidence for the reversibility of gasteromycetization.

321 ***Ancestral range reconstruction.*** —Ancestral distribution reconstruction recovered a  
322 likely Paleotropical origin of the Boletaceae (DEC+J model chosen with lowest AIC  
323 and AICc for both coding sets), with two major descendant radiations originating in the

324 Paleotropics (Africa and Asia) and Neotropics (FIG. 3). In addition, we found evidence  
325 for multiple diversification events spurred by the separation of Gondawana (FIG. 3).  
326 Gondwanan separation occurred in two predominant phases: Phase 1, which involved  
327 the separation of Southern South America, Southern Africa, Australia-Antarctica, and  
328 Madagascar-India, beginning approximately 180 mya and largely completed by 120  
329 mya (Jokat et al. 2003) and Phase 2, involving the separation of South America and  
330 Africa, which was completed 80 mya (Reguero and Goin 2021). At the split between  
331 the Austroboletoidae and Suillelloidae (FIG. 3), we estimated a putative Phase 1  
332 Gondwanan separation to have occurred 150-120 mya, which led to rapid formation of  
333 South Temperate, Neotropical, and Paleotropical lineages. Later, around 90-70 mya, at  
334 least five putative Phase 2 separation events occurred, splitting the Paleotropical and  
335 Neotropical lineages.

336 In our four category paleo-region coding set, the Boletaceae ancestor was  
337 equally likely to be Neotropical or Paleotropical. However, the subsequent node that  
338 leads to the rest of the Boletaceae (excluding Phyllobolletoidae and Chalciporoideae)  
339 was well-supported as Paleotropical, as were all immediate descendent nodes. Our  
340 coding of the Chalciporoideae and the single *Phylloboletellus* specimen likely had a  
341 strong influence on deep-node ancestral range reconstructions. The backbone nodes of  
342 the Boletaceae excluding Phyllobolletoidae and Chalciporoideae were estimated as  
343 Asian in origin, corroborating the four-category analysis, though with less confidence.  
344 Migrations between phytogeographic regions were dominated by dispersals between the  
345 Indo-Malesian and Holarctic regions (FIGS. 3,4).

## 346 **DISCUSSION**

347 The fully resolved phylogeny supports the recognition of eight subfamilies, including  
348 the newly defined Phyllobolletelloideae and Suillelloideae (Tremble et al. 2023). The

349 subfamilial relationships were resolved for the first time. The Chalciporoideae was  
350 recovered as the earliest diverging group in the Boletaceae, a relationship previously  
351 noted by Wu et al. (2014). The enigmatic *P. chloephorus* (Singer and Diglio 1952) was  
352 the next lineage to branch off before the radiation that gave rise to the six additional  
353 subfamilies. Previous studies have placed *Pseudoboletus parasiticus* in a position  
354 similar to that of *P. chloephorus* in our study (Nuhn et al. 2013, Wu et al. 2014, Sato  
355 and Toju 2019, Caiafa and Smith 2022). We were, however, unable to include a  
356 representative of *P. parasiticus* in our study so cannot corroborate its putative  
357 phylogenetic position.

358         The tree topology has intriguing implications for the role of ecological  
359 transitions in Boletaceae diversification. Members of the earliest-diverging  
360 Chalciporoideae species can be facultatively ECM, saprotrophic or mycoparasitic  
361 (Caiafa and Smith 2022) and *P. chloephorus* may not be ECM given its occurrence in  
362 non-ectotrophic forests (Singer and Diglio 1952). Moreover, *P. parasiticus* and other  
363 *Pseudoboletus* spp. produce sporocarps directly attached to gasteroid *Scleroderma* and  
364 *Astraeus* and are assumed to be mycoparasites (Raidl 1997; Binder and Hibbet, 2006;  
365 Nuhn et al. 2013). Altogether, the basal position of these early diverging groups  
366 suggests that the ancestor of the Boletaceae was likely saprotrophic and not ECM. This  
367 possibility is in line with the results of Sato and Toju (2019) which indicated that the  
368 ECM habit emerged with the origin of the six derived Boletaceae subfamilies. Genomic  
369 changes coinciding with the emergence of an obligate ECM habit further support the  
370 view that this nutritional shift has profoundly impacted Boletaceae (Wu et al. 2022).

371         Many taxonomic changes in the Boletaceae have been proposed in recent years.  
372 In particular, new genera have been erected for phylogenetically unresolved lineages.  
373 Many of these new genera are mono- or oligo-typic (composed of one or few species)

374 (e.g. Castellano et al. 2016; Chakraborty et al. 2015; Henkel et al. 2016; Halling et al.  
375 2023). This proliferation of new genera has made it difficult or impossible to recognize  
376 inclusive groupings without requiring knowledge of the species. On the bright side, the  
377 strong nodal support throughout our phylogeny sets the stage for a new, comprehensive  
378 and stable generic-level taxonomy. We will address this in subsequent works when all  
379 recently described genera are represented.

380         Our biogeographic and divergence dating analyses support a Gondwanan origin  
381 of the Boletaceae. Subsequent divergence was likely facilitated by continental drift-  
382 based vicariance events and possible long-distance dispersals. Other recent studies have  
383 shown that lineages of ECM fungi originated in Gondwana or more recently in  
384 paleotropical regions (Hosaka et al. 2008, Matheny et al. 2009, Dentinger et al. 2010,  
385 Ryberg and Matheny 2011, Kennedy et al. 2012, Sanchez-Ramirez et al. 2015, Han et  
386 al. 2018; Hackel et al. 2022; Codjia et al. 2023). Phytogeographic endemism was  
387 implied with our biogeographic reconstruction. The strongest migrations occurred  
388 recently over the past 50 my between the Indo-Malesian and Holarctic regions. We  
389 acknowledge the difficulty to determining origins and dispersal events in the absence of  
390 fossils or other corroborating evidence. Nonetheless our study and others suggest that  
391 vicariance may have played a strong role in the distribution of ECM fungal taxa, despite  
392 the long-distance dispersal capacity of airborne spores (Matheny et al. 2009, Peay et al.  
393 2010, Peay and Matheny 2016). Conversely, pure vicariance cannot explain the close  
394 phylogenetic relationships seen between distantly disjunct taxa. Long-distance  
395 dispersals may have occurred, albeit rarely. While long-distance dispersal is  
396 demonstrably possible in the Boletaceae and other ECM lineages the likelihood of its  
397 frequent occurrence is low (Geml et al. 2012; Hackel et al. 2022; Tremble et al. 2022).  
398 Most basidiospores do not travel far from the parental sporocarp (Galante et al. 2011),



399 and the probability of two airborne basidiospores landing in close-enough proximity to  
400 mate is negatively correlated with increasing distance from sporocarps (Peay et al.  
401 2012; Golan and Pringle 2017). Such improbabilities notwithstanding, our  
402 biogeographic patterns are consistent with episodic long-distance dispersal, possibly by  
403 aerial dispersal of basidiospores, spores vectored by migrating animals (e.g., Elliot et al.  
404 2019) or somatic mycelia on rafting vegetation (Thiel et al. 2005).

405         Our biogeographic reconstructions are consistent with the “Southern Route to  
406 Asia” hypothesis (Wilf et al. 2019). This idea proposes that ECM Fagaceae and their  
407 symbiotic fungi originated in Gondwana and were carried on Australia north to Asia. In  
408 this scenario the Gondwanan ECM habitat tracked climatic niches on the desertifying  
409 continent northward as the Australian plate collided with the Pacific plate. A relictual  
410 ECM community remained in a newly isolated New Guinea and subsequently spread  
411 northwest along the montane Australasian archipelago, followed by dispersal into  
412 continental Asia. Many of the dispersal events we found between Indo-Malesia and  
413 other regions, especially the Holarctic, are inferred within the last 20 my, coincident  
414 with the late-Oligocene collision of Australia with the Pacific plate (Hall 2011). As  
415 suggested by Halling et al. (2011) recent Boletaceae migrations likely occurred across  
416 the Australasian archipelago and are corroborated by our inferred recent regional  
417 dispersal events.

418         Biogeographic reconstructions are highly sensitive to taxon sampling and our  
419 dataset is not immune to equivocal reconstructions. For example, in both coding  
420 schemes the ancestral node of the Chalciporoideae had the highest probabilities of a  
421 North Temperate and North American origin, respectively. However, with no  
422 Chalciporoideae samples from Asia, Africa or Australia/New Zealand in our study, their  
423 potential impacts on the reconstruction are unknown. Such sampling gaps

424 notwithstanding, we have the most geographically comprehensive sampling for  
425 Boletaceae ever compiled and provide the first opportunity to examine global-scale  
426 biogeographic patterns. Insights into the evolution of the Boletaceae are revealed for the  
427 first time, despite mild uncertainty at a minority of nodes.

428         The evolutionary origins of distinctive regional Boletaceae assemblages have  
429 long been a mystery (Horak 1977). For example, the endemic Boletaceae of Chile and  
430 Argentina have not been included in previous phylogenetic studies, and their  
431 morphology-based affinities have been inconclusive (Horak 1977). The recovery of  
432 several Chilean species as ancient lineages in four of the subfamilies implies that they  
433 have survived in isolation without speciating for millions of years. The closest relatives  
434 of these Chilean boletes occurred in geographic regions as disjunct as North America,  
435 lowland tropical northern South America, and Australia. *Boletus loyita* and *G.*  
436 *valdivianus* were most closely related to extant Australian taxa, suggesting an origin  
437 prior to final Gondwanan disarticulation (Reguero and Goin 2021). Close relationships  
438 between southern Gondwanan Australian and southern South American taxa have been  
439 documented elsewhere (Feng et al. 2017). In all likelihood Chilean boletes arose in  
440 Gondwana, separated from their sister lineages during Gondwanan disarticulation, and  
441 underwent no subsequent speciation for tens of millions of years.

442         Ancestral range reconstruction recovered an Asian origin of the core, “true  
443 porcini” genus *Boletus* s. str. as previously suggested (Feng et al. 2012). However, we  
444 cannot entirely rule out an African origin. The Central African endemic *Boletus*  
445 *alliaceus* was recovered here as a sister taxon to *Boletus* s. str., and a similar  
446 relationship was found for the recently described *Paxilloboletus africanus* (Badou et al.  
447 2022). Furthermore, we estimated the origin of *Boletus* s. str. to be 40 mya, which may  
448 indicate why the sister lineages to *Boletus* s. str. are endemic to Africa. India had

449 separated from Africa and Madagascar ~120 mya (Reguero and Goin 2021), and at 40  
450 mya was already colliding with Asia (Aitchison et al. 2007; Hu et al. 2016). If *B.*  
451 *alliaceus* and *P. africanus* are indeed sister lineages of *Boletus* s. str., then the arrival  
452 and subsequent diversification of true porcini in Asia must have been a dispersal event,  
453 because the separation of India from mainland Africa ~180-170 mya (Hankel 1994)  
454 occurred long before our estimated age of the *Boletus* s.s. ancestor (~40 mya). Even if a  
455 more recent ancestor existed in Madagascar or the Seychelles, the separation of India  
456 from these landmasses at ~90 mya (Storey et al. 1995) and ~64 mya (Norton and Sclater  
457 1979), respectively, is still much older than our current age estimates for true porcini.  
458 Furthermore, most or all ECM fungi in Madagascar appear to have arrived on the island  
459 through dispersal its separation from Africa (Rivas-Ferreiro et al. 2023), so dispersal is  
460 the most plausible mechanism unless ancient Malagasy relict taxa are discovered. In the  
461 current study currently undescribed species of *Boletus* s. str. were recovered from  
462 Taiwan, Malaysian Borneo, and the Gulf Coast of the US, indicating that much more  
463 diversity exists in the genus. To sort out the origins and full diversity of *Boletus* s. str.  
464 more mycological exploration and whole genome sequencing are needed. In particular,  
465 discovery and analysis of true porcini basal lineages from India and Africa could shed  
466 further light on the origin of this charismatic group.

467         Divergence dating estimated the origin of the Boletaceae at 138-139 mya, and  
468 ancestral range reconstructions suggested it may be even older. Ranking genes with  
469 different metrics had little impact on divergence date estimates. However, the two  
470 calibrations sets gave very different estimates for most nodes. The estimated origin  
471 dates of the Boletaceae using the Varga et al. (2019) calibrations were almost half those  
472 of the two-calibration set. It is difficult to interpret these wildly different divergence  
473 dates given the lack of fossil evidence. However, the dates estimated using the Varga et

474 al. (2019) calibrations are suspect due to extensive topological incongruence of their  
475 phylogenetic trees with ours. Our older divergence estimate corroborates the results of  
476 He et al. (2020) and our internal dates correspond with other results, such as the ~48  
477 mya origin of the *Strobilomyces* group (Han et al. 2018). Our older divergence estimate  
478 is also in line with the origin of ECM Pinaceae in the early Cretaceous (Brundrett and  
479 Tedersoo 2018). Therefore, we consider the older estimate to be more accurate.

480         In our ancestral range reconstruction analysis, we found evidence of multiple  
481 diversification events that may have been initiated by Gondwanan breakup. The first  
482 phase of the Gondwanan separation postulated by Jokat et al. (2003) correlates well  
483 with our estimated origin of the Boletaceae and indicates that the family was diverse  
484 and widely distributed by 120 mya, substantially older than the estimated age from our  
485 divergence dating analysis but within the 95% confidence interval. Our dates are at best  
486 coarse estimates based on fossil-free secondary calibrations. However, the phylogenetic  
487 pattern of vicariance that parallels the breakup of Gondwana is compelling and offers  
488 corroborating evidence that our estimated ages may in fact be too young. In any case,  
489 our divergence estimates suggest that the Boletaceae originated and diversified within  
490 the early to late Cretaceous period. During this time global climate was warm and wet  
491 (Hay and Floegal 2012), gymnosperms and subsequently angiosperms diversified (Crisp  
492 and Cook 2011), and the supercontinental land masses broke apart (Jokat et al. 2003).

493         The Boletaceae mostly consists of species that form ECM associations, but  
494 emerging evidence suggests the ancestor may have had mycoparasitic capacity. The  
495 gain of obligate ECM ecology in the six most-derived subfamilies likely occurred after  
496 their divergence from the Phylloboletelloidae. *Phylloboletellus chloephorus* is from  
497 non-ECM dominated habitats. The Chalciporoideae have not been definitively shown to  
498 form ECM associations but do have saprotrophic or mycoparasitic capacities (Caiafa et

499 al. 2022). While mycoparasitic *Pseudoboletus* species have also been recovered as  
500 early-diverging Boletaceae lineages (Nuhn et al. 2013, Sato and Toju 2019, Cortes-  
501 Perez et al. 2023) and may have close affinities with lamellate *Phylloboletellus*, we  
502 were not able to evaluate *Pseudoboletus* in this study. A more thorough investigation of  
503 the ecology of early-diverging Boletaceae is needed to test this “mycoparasitic origin”  
504 hypothesis.

505         A longest standing debate among Boletaceae systematists has centered on the  
506 utility of morphological traits for defining natural genera. Basidiospore color,  
507 ornamentation, and hymenophore arrangement were long emphasized in this respect.  
508 These features have been used as evidence for dividing the Boletaceae into multiple  
509 genera (e.g., Singer 1945a,b; 1947; Pegler and Young 1981) or treating nearly all  
510 Boletaceae as a single genus (Corner 1972). More recently, hyphal anatomies of  
511 sporocarp structures and pigment chemistry have been emphasized (e.g. Binder et al.  
512 2002; Šutara 2005). Yet, despite the morphological and chemical variability in the  
513 Boletaceae, the family is typified by the ‘bolete’ macromorphology of fleshy, pileate-  
514 stipitate sporocarps with tubular hymenophores. In addition, type of basidiospore  
515 ornamentation has been long considered to be a genus-unifying trait in genera such as  
516 *Strobilomyces*, *Boletellus*, and *Austroboletus* (Berkeley 1851, Murrill 1909, Corner  
517 1972, Pegler and Young 1981, Wolfe 1980). Despite such traditional views, our  
518 ancestral state reconstructions suggest that the ancestor of the Boletaceae had a pileate-  
519 stipitate sporocarp with a lamellate hymenophore and ornamented basidiospores. This  
520 likely resulted from the basal phylogenetic position of the lamellate *P. chloephorus*  
521 (Singer and Diglio 1952).

522         The evolution of sequestrate morphologies has long been thought to be  
523 irreversible (Thiers 1984). The transition from pileate-stipitate to secotioid to gasteroid

524 morphology involves enclosure of the hymenophore and loss of ballistospor, which are  
525 unlikely to be regained once lost (Hibbett et al. 1997, Hibbett 2004, Sanchez-Garcia et  
526 al. 2020). However, prior studies have not fully rejected the hypothesis that  
527 gasteromycetization is irreversible (Hibbett 2004; Wilson et al. 2011; Sanchez-Garcia et  
528 al. 2020). Our ancestral state reconstructions under two coding schemes strongly  
529 supported transition to and from gasteroid forms. This suggests that gains or losses of  
530 ballistospor may also be reversible conditions. In our analyses, transitions between  
531 pileate-stipitate with exposed hymenophore, secotioid, and gasteroid forms suggest that  
532 the secotioid condition is intermediate, as indicated by the equal rates of transition to  
533 gasteroid and pileate-stipitate forms. Moreover, inferred transition rates from pileate-  
534 stipitate to both secotioid and gasteroid forms were almost zero, suggesting that the  
535 secotioid condition is evolutionarily unstable. This result contrasts with the stability of  
536 *Cortinarius* secotioid taxa suggested by Peinter et al. (2001). A plausible hypothesis is  
537 that a membranous partial veil that covers the hymenophore at early stages of sporocarp  
538 development may predispose it to gasteromycetization. However, although we did not  
539 test this explicitly, based on the phylogenetic distribution of taxa with membranous  
540 veils (e.g., *Pulveroboletus*, *Veloporphyrillus*), it is clear that the membranous partial  
541 veil is a convergent trait not closely associated with secotioid or gasteroid  
542 morphologies. A possible exception to this is *Veloboletus limbatus*, which is most  
543 closely related to the gasteroid *Gastroboletus valdivianus*, although their common  
544 ancestor was estimated at ~40 mya.

545       Transitions between hymenophore organization parallels the sporocarp  
546 morphologies. The “tubular with crosswalls” hymenophore condition appears to be  
547 intermediate between lamellate and tubulate forms, with transitions to tubes being 1.3-  
548 5.8 times greater than the opposite transitions. However, the greatest transition rate was

549 from lamellate directly to tubulate forms, indicating that an intermediate morphology  
550 may not be necessary or, like the secotioid condition, may be evolutionarily unstable.  
551 Our data provide compelling evidence that lamellate hymenophores, color changes, and  
552 gasteromycetization have evolved multiple times in the Boletaceae and are reversible.

### 553 **SUMMARY**

554 The Boletaceae underwent a rapid radiation and subsequent long period of phylogenetic  
555 instability. These issues had long prevented accurate assessment and analysis of trait  
556 evolution and conclusive generic-level taxonomic frameworks in the family. Previous  
557 molecular phylogenetic studies were based on a limited taxon sampling and a few loci  
558 and generated trees with many short branches and little deep-node support. This study  
559 provides the first Boletaceae phylogeny with strong support at deep nodes, based on a  
560 massive dataset of 1461 single copy genes from 383 genomes sampled from  
561 taxonomically and geographically comprehensive specimens. Our analyses indicated  
562 that the Boletaceae likely arose before Gondwanan breakup and that present-day  
563 distributions are partly due to vicariance. Long-distance dispersal could not be ruled out  
564 for some current distributions. Morphological traits resulted from convergence and  
565 frequent reversals, which, along with rapid radiation, have long confounded attempts to  
566 achieve a natural intrafamilial classification. This study provides new genomic data and  
567 a solid phylogenetic framework that will enable a renewed foundational taxonomy as  
568 well as deeper analysis of trait evolution.

### 569 **ACKNOWLEDGEMENTS**

570 This work was supported by NSF-DEB awards DEB-2114785 to BD and DEB-0918591  
571 to TWH and DEB-1556338 to TWH and BD; National Geographic Society's  
572 Committee for Research and Exploration grants (6679-99, 7435-03, and 8481-08 to  
573 TWH). JMM was supported by grants from the ROM Governors and the Natural

574 Sciences and Engineering Research Council of Canada, Discovery Program. We would  
575 like to thank Dr. Roy Halling for the numerous specimens provided.

576 **CONFLICTS OF INTEREST**

577 The authors declare no conflict of interest, financial or otherwise.

578 **LITERATURE CITED**

579 Aitchison JC, Ali JR, and Davis AM. 2007. When and where did India and Asia  
580 collide? *Journal of Geophysical Research: Solid Earth*. 112:B5

581

582 Arora D. 2008. California porcini: three new taxa, observations on their harvest, and the  
583 tragedy of no commons. *Economic Botany*. 62:356–375.

584

585 Badou SA, Furneaux B, De Kesel A, Khan FK, Houdanon RD, Ryberg M, Yorou NS.

586 2022. *Paxilloboletus* gen. nov., a new lamellate bolete genus from tropical Africa.

587 *Mycological Progress*. 21:243–256.

588

589 Bankevich A, Nurk S, Antipov D, Gurevich AA, Dvorkin M, Kulikov AS, Lesin VM,

590 Nikolenko SI, Pham S, Prjibelski AD, Pyshkin AV, Sirotkin AV, Vyahhi N, Tesler G,

591 Alekseyev MA, and Pevzner PA. 2012. SPAdes: a new genome assembly algorithm and

592 its applications to single-cell sequencing. *Journal of Computational Biology*. 19:455–

593 477.

594

595 Berkeley MJ. 1851. Decades of fungi. Decade XXXIV. Sikkim-Himalayan fungi

596 collected by Dr. Hooker. *Hooker's Journal of Botany and Kew Gardens Miscellany*.

597 3:77—84.

598



- 599 Binder M, Bresinsky A. 2002. *Retiboletus*, a new genus for a species-complex in the  
600 Boletaceae producing retipolides. Feddes Repertorium. 113:30–40.  
601
- 602 Binder M, Hibbet DS. 2006. Molecular systematics and biological diversification of  
603 Boletales. Mycologia. 98:971–981.  
604
- 605 Brundrett MC, Tedersoo L. Evolutionary history of mycorrhizal symbioses and global  
606 host plant diversity. New Phytologist. 220:1108–1115.  
607
- 608 Bruns TD, Palmer JD. 1989. Evolution of mushroom mitochondrial DNA: *Suillus* and  
609 related genera. Journal of Molecular Evolution. 28:349–362.  
610
- 611 Bruns TD, Vilgalys R, Barns SM, Gonzalez D, Hibbett DS, Lane DJ, Simon L, Stickel  
612 S, Szaro TM, Weisburg WG, Sogin ML. 1992. Evolutionary relationships within the  
613 fungi: analyses of nuclear small subunit rRNA sequences. Molecular Phylogenetics and  
614 Evolution. 1:231—241.  
615
- 616 Caiafa MV, Smith ME. 2022. Polyphyly, asexual reproduction and dual trophic mode in  
617 *Buchwaldoboletus*. Fungal Ecology. 56:101—141.  
618
- 619 Castellano MA, Elliott TF, Truong F, Séné O, Dentinger BTM, Henkel TW. 2016.  
620 *Kombocles bakaiana* gen. sp. nov. (Boletaceae), a new sequestrate fungus from  
621 Cameroon. IMA Fungus. 7: 239–245.  
622

- 623 Chakraborty D, Das K. 2015. A new generic record of Boletaceae for Indian mycobiota.  
624 *Current Research in Environmental & Applied Mycology*. 5:138–144.  
625
- 626 Chen S, Zhou Y, Chen Y, Gu J. 2018. fastp: an ultra-fast all-in-one FASTQ  
627 preprocessor. *Bioinformatics*. 34:884–890.  
628
- 629 Codjia JEI, Sánchez-Ramírez S, Ndolo Ebika ST, Wu G, Margaritescu S, Komura DL,  
630 Oliveira JJS, Ryberg M, Tulloss RE, Yorou NS, Moncalvo JM, Yang ZL. 2023.  
631 Historical biogeography and diversification of ringless *Amanita* (section *Vaginatae*)  
632 support an African origin and suggest niche conservatism in the Americas. *Molecular*  
633 *Phylogenetics and Evolution*. 178:107644.  
634
- 635 Corner EJH. 1972. *Boletus in Malaysia*. The Botanic Gardens Singapore. The  
636 Government Printer. 263pp  
637
- 638 Cortés-Pérez A, Ramirez-Guillen F, Garcia-Jimenez J, Ramirez-Cruz V, Villalobos-  
639 Arambula AR, Reynaga DMB, Guzman-Davalos L. 2023. *Pseudoboletus silvaticus*  
640 (Boletaceae, Basidiomycota), a new species from Mexico. *Phytotaxa*. 589:27–38.  
641
- 642 Crisp MD and Cook LG. 2011. Cenozoic extinctions account for the low diversity of  
643 extant gymnosperms compared with angiosperms. *New Phytologist*. 192:997–1009.  
644
- 645 Das K, Chakraborty D, Baghela A, Singh SK, Dentinger BTM. 2015. *Boletus*  
646 *lakhanpalii*, a new species in Boletaceae from Sikkim India with uncertain phylogenetic  
647 placement. *Sydowia*. 67:11–19.

648

649 Das K, Chakraborty D, Baghela A, Singh SK, Dentinger BTM. 2016. New species of  
650 xerocomoid boletes (Boletaceae) from Himalayan India based on morphological and  
651 molecular evidence. *Mycologia*. 108:753–764.

652

653 Dentinger BTM, Ammirati JF, Both EE, Desjardin DE, Halling RE, Henkel TW,  
654 Moreau PA, Nagasawa E, Soyong K, Taylor AF, Watling R, Moncalvo JM,  
655 McLaughlin DJ. 2010. Molecular phylogenetics of porcini mushrooms (*Boletus* section  
656 *Boletus*). *Molecular Phylogenetics and Evolution*. 57:1276–1292.

657

658 Dentinger BTM, Gaya E, O’Brien H, Suz LM, Lachlan R, Diaz-Valderrama JR, Koch  
659 RA, Aime MC. 2016. Tales from the crypt: genome mining from fungarium specimens  
660 improves resolution of the mushroom tree of life. *Biological Journal of the Linnean  
661 Society*. 117:11–32.

662

663 Dentinger BTM, Suz LM. 2014. What’s for dinner? Undescribed species of porcini in a  
664 commercial packet. *PeerJ*. 2:e570.

665

666 Drehmel D, James T, Vilgalys R. 2008. Molecular phylogeny and biodiversity of the  
667 boletes. *Fungi*. 1:17—23.

668

669 Elliott TF, Jusino MA, Trappe JM, Lepp H, Ballard GA, Bruhl JJ, Verns K. 2019. A  
670 global review of the ecological significance of symbiotic associations between birds and  
671 fungi. *Fungal Diversity*. 98:161—194.

672

- 673 Feng F, Xu J, Wu G, Zeng NK, Li YC, Tolgor B, Kost GW, Yang ZL. 2012. DNA  
674 sequence analyses reveal abundant diversity, endemism and evidence for Asian origin  
675 of the porcini mushrooms. PLOS ONE. 7:e37567.  
676
- 677 Feng YJ, Blackburn DC, Liang D, Hillis DM, Wake DB, Zhang P. 2017.  
678 Phylogenomics reveals rapid, simultaneous diversification of three major clades of  
679 Gondwanan frogs at the Cretaceous–Paleogene boundary. Proceedings of the National  
680 Academy of Sciences. 114:E5864—E5870.  
681
- 682 Fulgenzi TD, Halling RE, Henkel TW. 2010. *Fistulinella cinereoalba* sp. nov. and new  
683 distribution records for *Austroboletus* from Guyana. Mycologia. 102:224–232.  
684
- 685 Fulgenzi TD, Henkel TW, Halling RE. 2007. *Tylopilus orsonianus* sp. nov. and  
686 *Tylopilus eximius* from Guyana. Mycologia. 99:622–627.  
687
- 688 Fulgenzi TD., Mayor JR, Henkel TW, Halling RE. 2008. New species of *Boletellus*  
689 from Guyana. Mycologia. 100:490–495.  
690
- 691 Futuyma DJ. 1998. Evolutionary Biology. Quarterly Review of Biology. 73.  
692
- 693 Galante TE, Horton TR, Swaney DP. 2011. 95% of basidiospores fall within 1 m of the  
694 cap: a field-and modeling-based study. Mycologia. 103:1175–1183.  
695
- 696 Geml , Timling I, Robinson CH, Lennon N, Nusbaum CH, Brochmann C, Noordeloos  
697 ME, Taylor DL. 2012. An arctic community of symbiotic fungi assembled by long-

- 698 distance dispersers: phylogenetic diversity of ectomycorrhizal basidiomycetes in  
699 Svalbard based on soil and sporocarp DNA. *Journal of Biogeography*. 39:74—88.  
700
- 701 Golan JJ and Pringle A. 2017. Long-distance dispersal of fungi. *Microbiology*  
702 *Spectrum*. 5:5—4.  
703
- 704 Grigoriev IV, Nikitin R, Haridas S, Kuo A, Ohm R, Otilar R, Riley R, Salamov A,  
705 Zhao X, Korzeniewski F, Smirnova T, Nordberg H, Dubchak I, Shabalov I. 2013.  
706 MycoCosm portal: gearing up for 1000 fungal genomes. *Nucleic Acids Research*.  
707 42:699–704  
708
- 709 Grubisha LC, Trappe JM, Molina R, Spatafora JW. 2001. Biology of the  
710 ectomycorrhizal genus *Rhizopogon*. V. Phylogenetic relationships in the Boletales  
711 inferred from LSU rDNA sequences. *Mycologia*. 93:82–89.  
712
- 713 Hackel J, Henkel TW, Moreau PA, De Crop E, Verbeken A, Sa M, Buyck B, Neves  
714 MA, Vasco-Palacios A, Wartchow F, Schimann H, Carriconde F, Garnica S,  
715 Courtecuisse R, Gardes M, Manzi S, Louisanna E, Roy M. 2022. Biogeographic history  
716 of a large of ectomycorrhizal fungi, the Russulaceae, in the Neotropics and adjacent  
717 regions. *New Phytologist*. 236:698—713.  
718
- 719 Halling RE. 1996. Boletaceae (Agaricales): Latitudinal biodiversity and biological  
720 interactions in Costa Rica and Colombia. *Revista de Biología Tropical*. 44:111–114.  
721

- 722 Halling RE, Desjardin DE, Fechner N, Arora D, Soyong K, Dentinger BTM. 2014.  
723 New Porcini (*Boletus* sect. *Boletus*) from Australia and Thailand. *Mycologia*. 106:830–  
724 834.  
725
- 726 Halling RE, Fechner NA, Holmes G, Davoodian N. 2023. *Kalaria* (Boletaceae,  
727 Boletoidae) gen. nov. in Australia: Neither a *Tylopilus* nor a *Porphyrellus*. *Fungal*  
728 *Systematics and Evolution*. 12:31—45.  
729
- 730 Halling RE, Fechner N, Nuhn M, Osmundson T, Soyong K, Arora D, Binder M,  
731 Hibbett D. 2015. Evolutionary relationships of *Heimioporus* and *Boletellus* (Boletales),  
732 with an emphasis on Australian taxa including new species and new combinations in  
733 *Aureoboletus*, *Hemileccinum* and *Xerocomus*. *Australian Systematic Botany*. 28:1–22.  
734
- 735 Halling RE, Osmundson TW, Neves MA. 2006. *Austroboletus mutabilis* from northern  
736 Queensland. *Muelleria*. 24:31–36.  
737
- 738 Halling RE, Nuhn M, Osmundson T, Fechner N, Trappe JM, Soyong K, Arora D,  
739 Hibbett DS, Binder M. 2012. Affinities of the *Boletus chromapes* group to *Royoungia*  
740 and the description of two new genera, *Harrya* and *Australopilus*. *Australian Systematic*  
741 *Botany*. 25:418–431.  
742
- 743 Halling RE, Osmundson TE, Neves MA. 2008. Pacific boletes: implications for  
744 biogeographic relationships. *Mycological Research*. 112:437–447.  
745

746 He MQ, Zhao RL, Hyde KD, Begerow D, Kemler M, Yurkov A, McKenzie EHC,  
747 Raspé O, Kakishima M, Sánchez-Ramírez S, Vellinga EC, Halling RE, Papp V,  
748 Zmitrovich IV, Buyck B, Ertz D, Wijayawardene NN, Cui BK, Schoutteten N, Liu XZ,  
749 Li TH, Yao YJ, Zhu XY, Liu AQ, Li GJ, Zhang MZ, Ling ZL, Cao B, Antonín V,  
750 Boekhout T, da Silva BDB, De Crop E, Decock C, Dima B, Dutta AK, Fell JW, Geml J,  
751 Ghobad-Nejhad M, Giachini AJ, Gibertoni TB, Gorjón SP, Haelewaters D, He SH,  
752 Hodgkinson BP, Horak E, Hoshino T, Justo A, Lim YW, Menolli N, Mešić A,  
753 Moncalvo JM, Mueller GM, Nagy LG, Nilsson RH, Noordeloos M, Nuytinck J, Orihara  
754 T, Ratchadawan C, Rajchenberg M, Silva-Filho AGS, Sulzbacher MA, Tkalčec Z,  
755 Valenzuela R, Verbeken A, Vizzini A, Wartchow F, Wei TZ, Weiß M, Zhao CL, Kirk  
756 PM. 2020. Notes, outline and divergence times of Basidiomycota. *Fungal Diversity*.  
757 99:105—367.  
758  
759 Han LH, Feng B, Wu G, Halling RE, Buyck B, Yorou NS, Ebika STN, Yang ZL. 2018.  
760 African origin and global distribution patterns: Evidence inferred from phylogenetic and  
761 biogeographical analyses of ectomycorrhizal fungal genus *Strobilomyces*. *Journal of*  
762 *Biogeography*. 45:201—212.  
763  
764 Hay WW and Floegel S. 2012. New thoughts about the Cretaceous climate and oceans.  
765 *Earth-Science Reviews*. 115:262—272.  
766  
767 Heinemann P. 1951. Champignons récoltes au Congo belge par Madame M. Goossens-  
768 Fontana I. *Boletineae*. *Bulletin du Jardin botanique de l'État a Bruxelles*. 21:223—346.  
769

- 770 Henkel TW, Aime MC, Chin M, Miller SL, Vigalys R, Smith ME. 2012.  
771 Ectomycorrhizal fungal sporocarp diversity and discovery of new taxa in *Dicymbe*  
772 monodominant forests of the Guiana Shield. *Biodiversity and Conservation*. 21:2195—  
773 2220.  
774  
775 Henkel TW, Obase K, Husbands D, Uehling JK, Bonito G, Aime MC, Smith ME. 2016.  
776 New Boletaceae taxa from Guyana: *Binderoboletus segoi* gen. and sp. nov.,  
777 *Guyanaporus albipodus* gen. and sp. nov., *Singerocomus rubriflavus* gen. and sp. nov.,  
778 and a new combination for *Xerocomus inundabilis*. *Mycologia*. 108:157–173.  
779  
780 Hibbett DS. 2004. Trends in morphological evolution in Homobasidiomycetes inferred  
781 using maximum likelihood: a comparison of binary and multistate approaches.  
782 *Systematic Biology*. 53:889–903.  
783  
784 Hibbett DS, Pine EM, Langer E, Langer G, Donoghue MJ. 1997. Evolution of gilled  
785 mushrooms and puffballs inferred from ribosomal DNA sequences. *Proceedings of the*  
786 *National Academy of Sciences*. 94:12002–12006.  
787  
788 Hoang DT, Chernomor O, von Haeseler A, Minh BQ, Vinh LS. 2018. UFBoot2:  
789 Improving the ultrafast bootstrap approximation. *Molecular Biology and Evolution*.  
790 35:518–522.  
791  
792 Horak E. 1977. New and rare boletes from Chile, *Nothofagus chilenos*, *Gastroboletus*  
793 *valdivians*, *Boletus loyita*, *Boletus putidus*. *Boletín de la Sociedad Argentina de*  
794 *Botánica*.



795

796 Hosaka K, Castellano MA, Spatafora JW. 2008. Biogeography of Hysterangiales

797 (Phallomycetidae, Basidiomycota. Mycological Research. Phylogeography and

798 Biogeography of Fungi. 112:448–462.

799

800 Hu X, Garxanti E, Wang J, Huang W, An W, Webb A. 2016. The timing of India-Asia

801 collision onset—facts, theories, controversies. Earth Science Reviews. 160:264—299.

802

803 Husbands DR, Henkel TW, Bonito G, Vilgalys R, Smith ME. 2013. New species of

804 *Xerocomus* (Boletales) from the Guiana Shield, with notes on their mycorrhizal status

805 and fruiting occurrence. Mycologia. 105:422–435.

806

807 Jokat W, Boebel T, König M, Meyer U. 2003. Timing and geometry of early Gondwana

808 breakup. Journal of Geophysical Research: Solid Earth. 108:2156—2202.

809

810 Kalyaanamoorthy S, Minh BQ, Wong TKF, von Haeseler A, Jermiin LS. 2017.

811 ModelFinder: fast model selection for accurate phylogenetic estimates. Nature Methods.

812 14:587–589.

813

814 Katoh K, Rozewicki J, Yamada KD. 2017. MAFFT online service: multiple sequence

815 alignment, interactive sequence choice and visualization. Briefings in Bioinformatics.

816 20:1160—1166.

817

- 818 Kennedy PG, Matheny PB, Ryberg KM, Henkel TW, Uehling JK, Smith ME. 2012.  
819 Scaling up: examining the macroecology of ectomycorrhizal fungi. *Molecular Ecology*.  
820 21:4151–4154.  
821
- 822 Kohler A, Kuo A, Naga LG, Morin E, Berry KW, Buscot F, Canback B, Choi C,  
823 Cichocki N, Clum A, Colpaert J, Copeland A, Costa MD, Dore J, Floudas D, Gay G,  
824 Girlanda M, Henrissat B, Herrmann S, Hess J, Hogberg N, Johansson T, Khouja HR,  
825 LaButti K, Lahrman U, Levasseur A, Lindquist EA, Lipzen A, Marmeisse R, Martino  
826 E, Murat C, Ngan CY, Nehls U, Plett JM, Pringle A, Ohm RA, Perotto S, Peter M,  
827 Riley R, Rineau F, Ruytinx J, Salamov A, Shah F, Sun H, Tarkka M, Tritt A, Veneault-  
828 Fourrey C, Zuccaro A, Mycorrhizal Genomics Initiative Consortium, Tunlid A,  
829 Grigoriev IG, Hibbett DS, Martin F. 2015. Convergent losses of decay mechanisms and  
830 rapid turnover of symbiosis genes in mycorrhizal mutualists. *Nature Genetics*. 47:410–  
831 415.  
832
- 833 Landis MJ, Matzke NJ, Moore BR, Huelsenbeck JP. 2013. Bayesian analysis of  
834 biogeography when the number of areas is large. *Systematic Biology*. 62:789–804.  
835
- 836 Liimatainen K, Kim JT, Pokorny L, Kirk PM, Dentinger BTM, Niskanen T. 2022.  
837 Taming the beast: a revised classification of Cortinariaceae based on genomic data.  
838 *Fungal Diversity*. 112:89–170.  
839
- 840 Liu Y, Xu X, Dimitrov D, Pellissier L, Borregaard MK, Shrestha N, Su X, Luo A,  
841 Zimmermann NE, Rahbek C, Wang Z. 2023. An updated floristic map of the world.  
842 *Nature Communications*. 14:2990.

843

844 Magnago AC, Neves MA, da Silveira RMB. 2017. *Fistulinella ruschii*, sp. nov., and a  
845 new record of *Fistulinella campinaranae* var. *scrobiculata* for the Atlantic Forest,  
846 Brazil. *Mycologia*. 109:1003—1013.

847

848 Matheny PB, Aime MC, Bougher NL, Buyck B, Desjardin DE, Horak E, Kropp BR,  
849 Lodge DJ, Soyong K, Trappe JM, Hibbett DS. 2009. Out of the Palaeotropics?  
850 Historical biogeography and diversification of the cosmopolitan ectomycorrhizal  
851 mushroom family Inocybaceae. *Journal of Biogeography*. 36:577–592.

852

853 Meade A and Pagel M. 2022. Ancestral state reconstruction using BayesTraits.  
854 *Environmental Microbial Evolution: Methods and Protocols*. New York, NY: Springer  
855 US. 255-266.

856

857 Minh BQ, Schmidt HA, Chernomor O, Schrempf D, Woodhams MD, von Haeseler A,  
858 Lanfear R. 2020. IQ-TREE 2: new models and efficient methods for phylogenetic  
859 inference in the genomic era. *Molecular Biology and Evolution*. 37:1530–1534.

860

861 Miyauchi S, Kiss E, Kuo A, Drula E, Kohler A, Sánchez-García M, Morin E,  
862 Andreopoulos B, Barry KW, Bonito G, Buée M, Carver A, Chen C, Cichocki N, Clum  
863 A, Culley D, Crous PW, Fauchery L, Girlanda M, Hayes RD, Kéri Z, LaButti K, Lipzen  
864 A, Lombard V, Magnuson J, Maillard F, Murat C, Nolan M, Ohm RA, Pangilinan J,  
865 Pereira MF, Perotto S, Peter M, Pfister S, Riley R, Sitrit Y, Stielow JB, Szöllösi G,  
866 Žifčáková L, Štursová M, Spatafora JW, Tedersoo L, Vaario LM, Yamada A, Yan M,  
867 Wang P, Xu J, Bruns T, Baldrian P, Vilgalys R, Dunand C, Henrissa Bt, Grigoriev IV,

- 868 Hibbett D, Nagy LG, Martin FM. 2020. Large-scale genome sequencing of mycorrhizal  
869 fungi provides insights into the early evolution of symbiotic traits. *Nature*  
870 *Communications*. 11:5125.  
871
- 872 Murrill WA. 1909. The Boletaceae of North America—I. *Mycologia*. 1:4–18.  
873
- 874 Nei M, Kumar S. 2000. *Molecular evolution and phylogenetics*. Oxford, New York:  
875 Oxford University Press; p. 352.  
876
- 877 Neves MA, Halling RE. 2010. Study on species of *Phylloporus* I: Neotropics and North  
878 America. *Mycologia*. 102:923–943.  
879
- 880 Norton IO, Sclater, JG. 1979. A model for the evolution of the Indian Ocean and the  
881 breakup of Gondwanaland. *Journal of Geophysical Research*. 84:6803–6830.  
882
- 883 Nuhn ME, Binder M, Taylor AFS, Halling RE, Hibbett DS. 2013. Phylogenetic  
884 overview of the Boletineae. *Fungal Biology*. 117:479–511.  
885
- 886 Peay KG, Kennedy PG, Davies SJ, Tan S, Bruns TD. 2010. Potential link between plant  
887 and fungal distributions in a dipterocarp rainforest: community and phylogenetic  
888 structure of tropical ectomycorrhizal fungi across a plant and soil ecotone. *New*  
889 *Phytologist*. 185:529—542  
890

- 891 Peay KG, Schubert MG, Nguyen NH, Bruns TD. 2012. Measuring ectomycorrhizal  
892 fungal dispersal: macroecological patterns driven by microscopic propagules. *Molecular*  
893 *Ecology*. 21:4122—4136.
- 894
- 895 Pegler DN, Young TWK. 1981. A natural arrangement of the Boletales, with reference  
896 to spore morphology. *Transactions of the British Mycological Society*. 76:103–146.
- 897
- 898 Peintner U, Bougher NL, Castellano MA, Moncalvo JM, Moser MM, Trappe JM,  
899 Vigalys R. 2001. Multiple origins of sequestrate fungi related to *Cortinarius*  
900 (*Cortinariaceae*). *American Journal of Botany*. 88:2168-2179.
- 901
- 902 Raidl S. 1997. Studien zur ontogenese rhizomorphen von ektomykorrhiza. *Bibliotheca*  
903 *Mycologica* 169:1–184.
- 904
- 905 Rambaut A, Drummond AJ, Xie D, Baele G, Suchard MA. 2018. Posterior  
906 summarization in bayesian phylogenetics using Tracer 1.7. *Systematic Biology*. 67:901–  
907 904.
- 908
- 909 Ree RH, Moore BR, Webb CO, Donoghue MJ. 2005. A likelihood framework for  
910 inferring the evolution of geographic range on phylogenetic trees. *Evolution*. 59:2299–  
911 2311.
- 912
- 913 Reguero MA, Goin FJ. 2021. Paleogeography and biogeography of the Gondwanan  
914 final breakup and its terrestrial vertebrates: New insights from southern South America

915 and the “double Noah's Ark” Antarctic Peninsula. *Journal of South American Earth*  
916 *Sciences*. 108:103358.

917

918 Rivas-Ferreiro M, Skarha SM, Rakotonasolo F, Suz LM, Dentinger BTM. 2023. DNA-  
919 based fungal diversity in Madagascar and arrival of the ectomycorrhizal fungi to the  
920 island. *Biotropica*. 55:954-968.

921

922 Ronquist F. 1994. Ancestral areas and parsimony. *Systematic Biology*. 43:0267– 274.

923

924 Ryberg M and Matheny PB. 2011. Dealing with incomplete taxon sampling and  
925 diversification of a large clade of mushroom-forming Fungi. *Evolution*. 65:1862–1878.

926

927 Sánchez-García M, Ryberg M, Khan FK, Hibbett DS. 2020. Fruiting body form, not  
928 nutritional mode, is the major driver of diversification in mushroom-forming fungi.  
929 *Proceedings of the National Academy of Sciences*. 117:32528–32534.

930

931 Sánchez-Ramírez S, Ryberg M, Khan FK, Varga T, Nagy LG, Hibbett DS. 2015. High  
932 speciation rate at temperate latitudes explains unusual diversity gradients in a clade of  
933 ectomycorrhizal fungi. *Evolution*. 69:2196–2209.

934

935 Sato H, Tanabe AS, Toju H. 2017. Host shifts enhance diversification of  
936 ectomycorrhizal fungi: diversification rate analysis of the ectomycorrhizal fungal genera  
937 *Strobilomyces* and *Afroboletus* with an 80-gene phylogeny. *New Phytologist*. 214: 443–  
938 454.

939

- 940 Sato H, Toju H. 2019. Timing of evolutionary innovation: scenarios of evolutionary  
941 diversification in a species-rich fungal clade, Boletales. *New Phytologist*. 222:1924–  
942 1935.
- 943
- 944 Schluter D. 2000. Ecological character displacement in adaptive radiation. *The*  
945 *American Naturalist*. 156:4–16.
- 946
- 947 Simões M, Breitzkreuz L, Alvarado M, Baca S, Cooper JC, Heins L, Herzog K,  
948 Lieberman BS. 2016. The evolving theory of evolutionary radiations. *Trends in Ecology*  
949 *& Evolution*, 31:27–34.
- 950
- 951 Singer R. 1945a. The Boletineae of Florida with notes on extralimital species I. *The*  
952 *Strobilomycetaceae*. *Farlowia*. 2:97–141.
- 953
- 954 Singer R. 1945b. The Boletineae of Florida with notes on extralimital species. II. *The*  
955 *Boletaceae*. *Farlowia*. 2:223–303
- 956
- 957 Singer R. 1947. The Boletoidae of Florida with notes on extralimital Species III. *The*  
958 *American Midland Naturalist*. 37:1–135.
- 959
- 960 Singer R and Digilio AP. 1951. Pródromo de la flora agaricina argentina. *Lilloa*. 5–461.
- 961
- 962 Sitta N, Floriani M. 2008. Nationalization and globalization trends in the wild  
963 mushroom commerce of Italy with emphasis on porcini (*Boletus edulis* and allied  
964 species. *Economic Botany*. 62:307.

965

966 Smith MR. 2020. Information theoretic generalized Robinson–Foulds metrics for  
967 comparing phylogenetic trees. *Bioinformatics*. 36:5007–5013.

968

969 Smith MR. 2022. Robust analysis of phylogenetic tree space. *Systematic Biology*.  
970 71:1255–1270.

971

972 Smith SA, Brown JW, Walker JF. 2018. So many genes, so little time: A practical  
973 approach to divergence-time estimation in the genomic era. *PLOS ONE*. 13:e0197433.

974

975 Soulebeau A, Aubriot X, Gaudeul M, Rougan G, Hennequin S, Haevermans T,  
976 Dubuisson JY, Jabbour F. 2015. The hypothesis of adaptive radiation in evolutionary  
977 biology: hard facts about a hazy concept. *Organisms Diversity & Evolution*. 15:747–  
978 761.

979

980 Stecher G, Tamura K, Kumar S. 2020. Molecular evolutionary genetics analysis  
981 (MEGA) for macOS. *Molecular Biology and Evolution*. 37:1237–1239.

982

983 Storey B. 1995. The role of mantle plumes in continental breakup: case histories from  
984 Gondwanaland. *Nature*. 377:301–308.

985

986 Šutara J. 2005. Central European genera of the Boletaceae and Suillaceae, with notes on  
987 their anatomical characters. *Czech Mycology*. 57:1–50.

988



- 989 Šutara J. 2014. Anatomical structure of pores in European species of genera *Boletus*  
990 s.str. and *Butyriboletus* (Boletaceae). *Czech Mycology*. 66:157–170.  
991
- 992 Tamura K, Battistuzzi FU, Billing Ross P, Murillo O, Filipski A, Kumar S. Estimating  
993 divergence times in large molecular phylogenies. *Proceedings of the National Academy*  
994 *of Sciences*. 109:19333–19338.  
995
- 996 Tamura K, Stecher G, Kumar S. 2021. MEGA11: molecular evolutionary genetics  
997 analysis Version 11. *Molecular Biology and Evolution*. 38:3022–3027.  
998
- 999 Tamura K, Tao Q, Kumar S. 2018. Theoretical foundation of the RelTime method for  
1000 estimating divergence times from variable evolutionary rates. *Molecular Biology and*  
1001 *Evolution*. 35:1770–1782.  
1002
- 1003 Tao Q, Tamura K, Kumar S. 2020. Efficient methods for dating evolutionary  
1004 divergences. Pp. 197– 219 in Ho SYW (Ed.) *The molecular evolutionary clock: theory*  
1005 *and practice*. Cham, Switzerland: Springer Nature Switzerland AG.  
1006
- 1007 Thiel M and Gutow L. 2005. The ecology of rafting in the marine environment. II. The  
1008 rafting organisms and community. *Oceanography and Marine Biology*. 43:279—418.  
1009
- 1010 Thiers HD. 1984. The secotioid syndrome. *Mycologia*, 76:1–8.  
1011

- 1012 Tremble K, Hoffman JI, Dentinger BTM. 2022. Contrasting continental patterns of  
1013 adaptive population divergence in the holarctic ectomycorrhizal fungus *Boletus edulis*.  
1014 New Phytologist. 237:295—309.  
1015
- 1016 Tremble K, Suz LM, Dentinger BTM. 2020. Lost in translation: population genomics  
1017 and long-read sequencing reveals relaxation of concerted evolution of the ribosomal  
1018 DNA cistron. Molecular Phylogenetics and Evolution. 148:106804.  
1019
- 1020 Tremble K, Halling RE, Henkel TW, Moncalvo JM, Dentinger BTM. 2023.  
1021 Nomenclatural novelties. Index Fungorum no. 555.  
1022 <https://www.indexfungorum.org/Publications/Index%20Fungorum%20no.555.pdf>  
1023
- 1024 Varga T, Krizsán K, Földi C, Dima B, Sánchez-García M, Sánchez-Ramírez S, Szöllősi  
1025 GJ, Szarkándi JG, Papp V, Albert L, Andreopoulos W, Angelini C, Antonín V, Barry  
1026 KW, Bougher NL, Buchanan P, Buyck B, Bense V, Catcheside P, Chovatia M, Cooper  
1027 J, Dämon W, Desjardin D, Finy P, Geml J, Haridas S, Hughes K, Justo A, Karasiński D,  
1028 Kautmanova I, Kiss B, Kocsubé S, Kotiranta H, LaButti KM, Lechner BE, Liimatainen  
1029 K, Lipzen A, Lukács Z, Mihaltcheva S, Morgado LN, Niskanen T, Noordeloos ME,  
1030 Ohm RA, Ortiz-Santana B, Ovrebo C, Rácz N, Riley R, Savchenko A, Shiryayev A,  
1031 Soop K, Spirin V, Szebenyi C, Tomšovský M, Tulloss RE, Uehling J, Grigoriev IV,  
1032 Vágvölgyi C, PappT, Martin FM, Miettinen O, Hibbett DS, Nagy LG. 2019.  
1033 Megaphylogeny resolves global patterns of mushroom evolution. Nature Ecology &  
1034 Evolution. 3:668–678.  
1035

- 1036 Vellinga EC, Kuyper TW, Ammirati J, Desjardin DE, Halling RE, Justo A, Laessle T,  
1037 Lebel T, Lodge DJ, Matheny PB, Methven AS, Moreau PA, Mueller GM, Noordeloos  
1038 ME, Nuytinck J, Ovrebo CL, Verbeken A. 2015. Six simple guidelines for introducing  
1039 new genera of fungi. *IMA Fungus*. 6:A65–A68.
- 1040
- 1041 Wilf P, Nixon KC, Gandolfo MA, Cuneo NR. 2019. Eocene Fagaceae from Patagonia  
1042 and Gondwanan legacy in Asian rainforests. *Science*. 364:5139.
- 1043
- 1044 Wilson AW, Binder M, Hibbett DS. 2011. Effects of gasteroid fruiting body  
1045 morphology on diversification rates in three independent clades of fungi estimated using  
1046 binary state speciation and extinction analysis. *Evolution*. 65:1305—1322.
- 1047
- 1048 Wu G, Feng B, Xu J, Zhu XT, Li YC, Zeng NK, Hosen MI, Yang ZL. 2014. Molecular  
1049 phylogenetic analyses redefine seven major clades and reveal 22 new generic clades in  
1050 the fungal family Boletaceae. *Fungal Diversity*. 69:93–115.
- 1051
- 1052 Wu G, Miyauchi S, Morin E, Kuo A, Drula E, Varga T, Kohler A, Feng B, Cao Y,  
1053 Lipzen A, Daum C, Hundley H, Pangilinan J, Johnson J, Barry K, LaButti K, Ng V,  
1054 Ahrendt S, Min B, Choi IG, Park H, Plett JM, Magnuson J, Spatafora JW, Nagy LG,  
1055 Henrissat B, Grigoriev IV, Yang ZL, Xu J, Martin FM. 2022. Evolutionary innovations  
1056 through gain and loss of genes in the ectomycorrhizal Boletales. *New Phytologist*.  
1057 233:1383–1400.
- 1058 **LEGENDS**
- 1059 **Table 1.** Morphological transition rates estimated with Bayestraits.

1060 **Figure 1.** Selected Boletaceae collections from two of the most species-rich regions that  
1061 were newly sequenced in this study. A) *Boletus cervinococcineus*, Singapore (BD616);  
1062 B) *Heimioporus punctisporus*, Sarawak (BAKO2); C) unidentified Boletaceae,  
1063 Vietnam (CTN-08-0007); D) unidentified Boletaceae (CTN-08-0029); E) *Spongiforma*  
1064 sp., Sarawak (BTNG10); F) *Leccinum* sp., Sarawak (SWK246); G) *Crocinoletus*  
1065 *laetissimus*, Sarawak (SWK335); H) unidentified Boletaceae sp., Viet- nam (DLT-08-  
1066 0127); I) *Boletellus* sp., Sarawak (SWK356); J) unidentified Boletaceae, Vietnam  
1067 (CTN-08-0051); K) *Tylophilus* sp., Cameroon (BD655); L) *Xerocomus* sp. 9. Cameroon  
1068 (BD773); M) *Fistulinella staudtii*, Cameroon (BD848); N) *Boletellus* sp., Cameroon  
1069 (BD714); O) *Phylloporus cf. tubipes*, Cameroon (BD719); P) *Tylophilus* sp. 8, Cameroon  
1070 (BD816); Q) *Xerocomus* sp. 8, Cameroon (BD695); R) *Boletus alliaceus*, Cameroon  
1071 (BD697); S) *Tubosaeta brunneosetosa*, Cameroon (BD686); T) *Tylophilus* sp.,  
1072 Cameroon (BD716). Not to scale.

1073 **Figure 2.** Time-calibrated phylogeny of Boletaceae using 1764 BUSCO genes.  
1074 Topology is a summary coalescent of individual best ML gene trees using astral-hybrid.  
1075 Numbers on branches are quartet probabilities. Branch lengths were converted to time  
1076 using the top 100 best gene trees estimated using SortaDate in RelTime. Inset a) map of  
1077 specimen origins with numbers of specimens from each geographic area. Inset  
1078 b) lineages-through-time plot calculated with the “ltt.plot” function in the R pack- age  
1079 “ape.” The dashed line represents a constant birth-death rate. The shaded box indicates a  
1080 period of significant divergent increase from a constant birth-death rate indicative of a  
1081 rapid radiation.

1082 **Figure 3.** Biogeographic reconstruction using BioGeoBEARS. Left-hand tree depicts 4-  
1083 state coding scheme (light blue=Neotropical, blue=Paletropical, yellow=North  
1084 Temperate, red=South Temperate) and right-hand tree depicts floristic region coding

1085 scheme (pink=Chilean-Patagonian, green=Indo-Malesian, blue=African,  
1086 yellow=Holarctic, red=Novo-Zealandic, light blue=Neotropical, orange=Australian).  
1087 Pie charts indicate the proportional likelihood of each state at a node. Red and black  
1088 boxes indicate Phase I and Phase II Gondwanan diversification events, respectively.

1089 **Figure 4.** Dispersal events and rates inferred from BioGeoBEARS. Top: Map depicting  
1090 phytogeographic zones that are colored and labeled on the map. Map was ren- dered  
1091 using the 'imago' R code (<https://github.com/hrbrmstr/imago>) to reproduce the  
1092 AuthaGraph world map projection (<http://www.authagraph.com/top/?lang=en>). Curved  
1093 arrows indicate inferred directional dispersal events and are colored by rate values  
1094 following the table (Bottom). The stroke weight of the arrows has been scaled to percent  
1095 of the maximum rate value following the values in the table. Bottom: Table of dispersal  
1096 rates inferred under a DIVAlize+j model in BioGeoBEARS. Source regions are at left  
1097 and destination regions are along the top. Values are colored along a scale from cool to  
1098 warm (red being maximum).

1099 **Figure 5.** Distribution of likelihood frequencies of morphological traits. A-C)  
1100 Illustrations of coded traits and inferred transition rates. Arrows indicate direction of  
1101 transition with stroke weights scaled to maximum rate value. D-I) Frequency  
1102 distributions of state probabilities for six trait codings. Traits and codes are labeled on  
1103 the x-axis.

1104

1105 \*Corresponding author: Email: [keaton.tremble@gmail.com](mailto:keaton.tremble@gmail.com). Current address:

1106 [Department of Biology, Duke University, Durham, North Carolina 27708.](#)

| <b>Trait</b>                | <b>Transition</b>              | <b>Mean rate</b> | <b>Median rate</b> |
|-----------------------------|--------------------------------|------------------|--------------------|
| <b>Ballistospory</b>        |                                |                  |                    |
|                             | Yes to No                      | 1.2303           | 1.0565             |
|                             | No to Yes                      | 39.8088          | 35.7478            |
| <b>Spore Ornamentation</b>  |                                |                  |                    |
|                             | Smooth to Not Smooth           | 0.7747           | 0.7498             |
|                             | Not Smooth to Smooth           | 1.741            | 1.464              |
| <b>Stipe</b>                |                                |                  |                    |
|                             | Absent to Present              | 33.685           | 27.67              |
|                             | Present to Absent              | 0.8415           | 0.6788             |
| <b>Sporocarp Habit</b>      |                                |                  |                    |
|                             | Secoitiod to Pileate-stipitate | 51.64            | 51.47              |
|                             | Pileate-stipitate to Secoitiod | 0.8178           | 0.7172             |
|                             | Secoitiod to Gasteroid         | 53.44            | 53.90              |
|                             | Gasteroid to Secoitiod         | 34.63            | 31.05              |
|                             | Pileate-stipitate to Gasteroid | 0.8393           | 0.6749             |
|                             | Gasteroid to Pileate-stipitate | 40.78            | 36.85              |
| <b>Hymenophore Bruising</b> |                                |                  |                    |
|                             | None to Blue                   | 1.3515           | 1.2632             |
|                             | None to Black                  | 0.6921           | 0.6921             |
|                             | Blue to None                   | 5.3730           | 5.3540             |
|                             | Blue to Black                  | 0.1732           | 0.1205             |
|                             | Black to None                  | 3.2329           | 2.7385             |
|                             | Black to Blue                  | 1.0294           | 0.7281             |
| <b>Hymenophore Anatomy</b>  |                                |                  |                    |
|                             | Straight to Cross              | 0.6398           | 0.6092             |
|                             | Straight to Lamellete          | 0.2054           | 0.1715             |
|                             | Cross to Straight              | 3.694            | 2.960              |
|                             | Cross to Lamellate             | 2.4131           | 1.6755             |
|                             | Lamellate to Straight          | 5.483            | 5.004              |
|                             | Lamellate to Cross             | 1.858            | 1.275              |

Southeast Asia

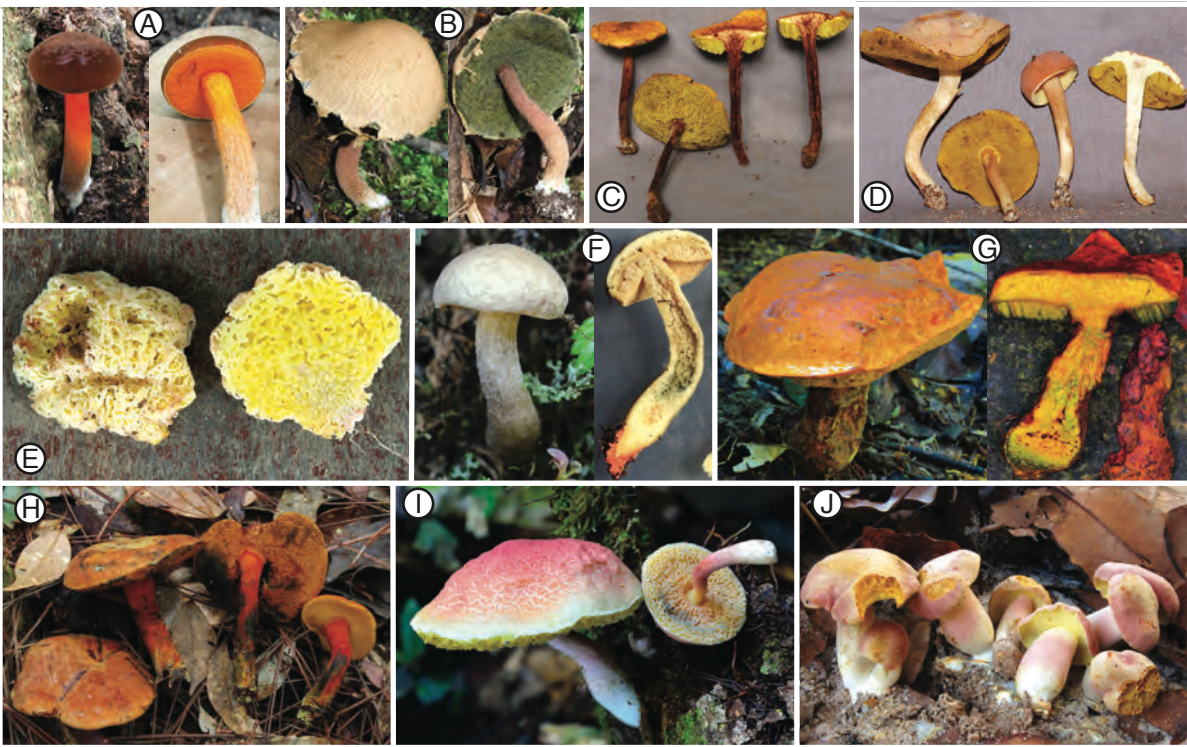

Africa

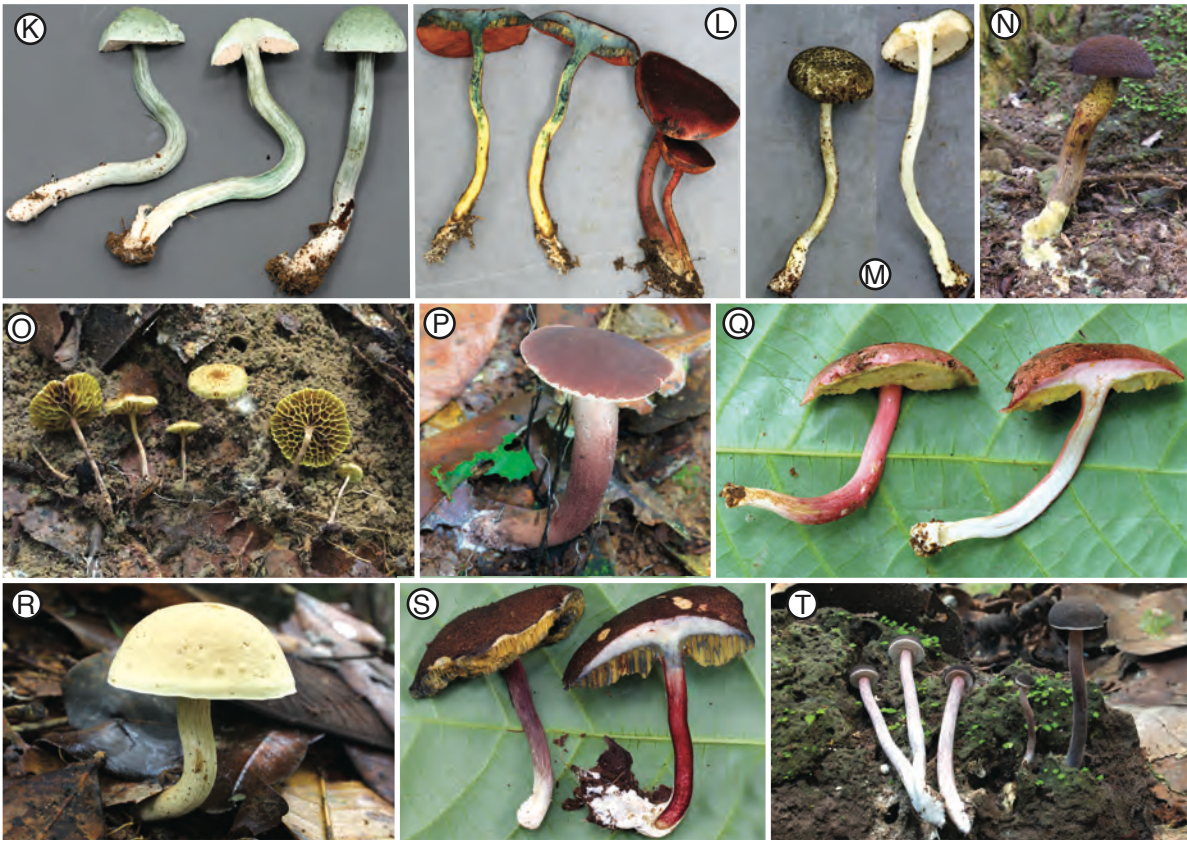

\*1764 BUSCO genes,  $\geq 20\%$  complete  
 \*ASTER summary coalescent of best ML gene trees  
 \*branch lengths converted to time in RelTime from 100 top-ranked trees using SortaDate

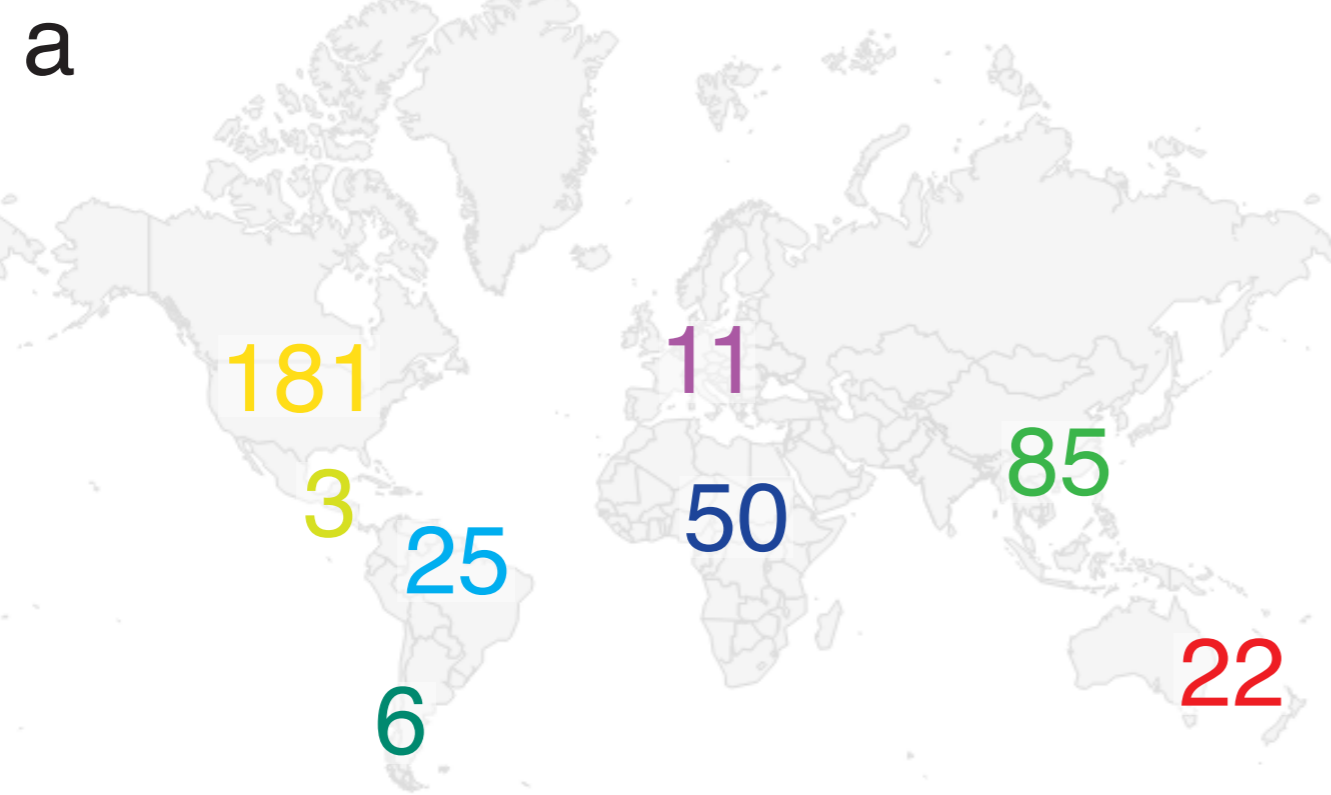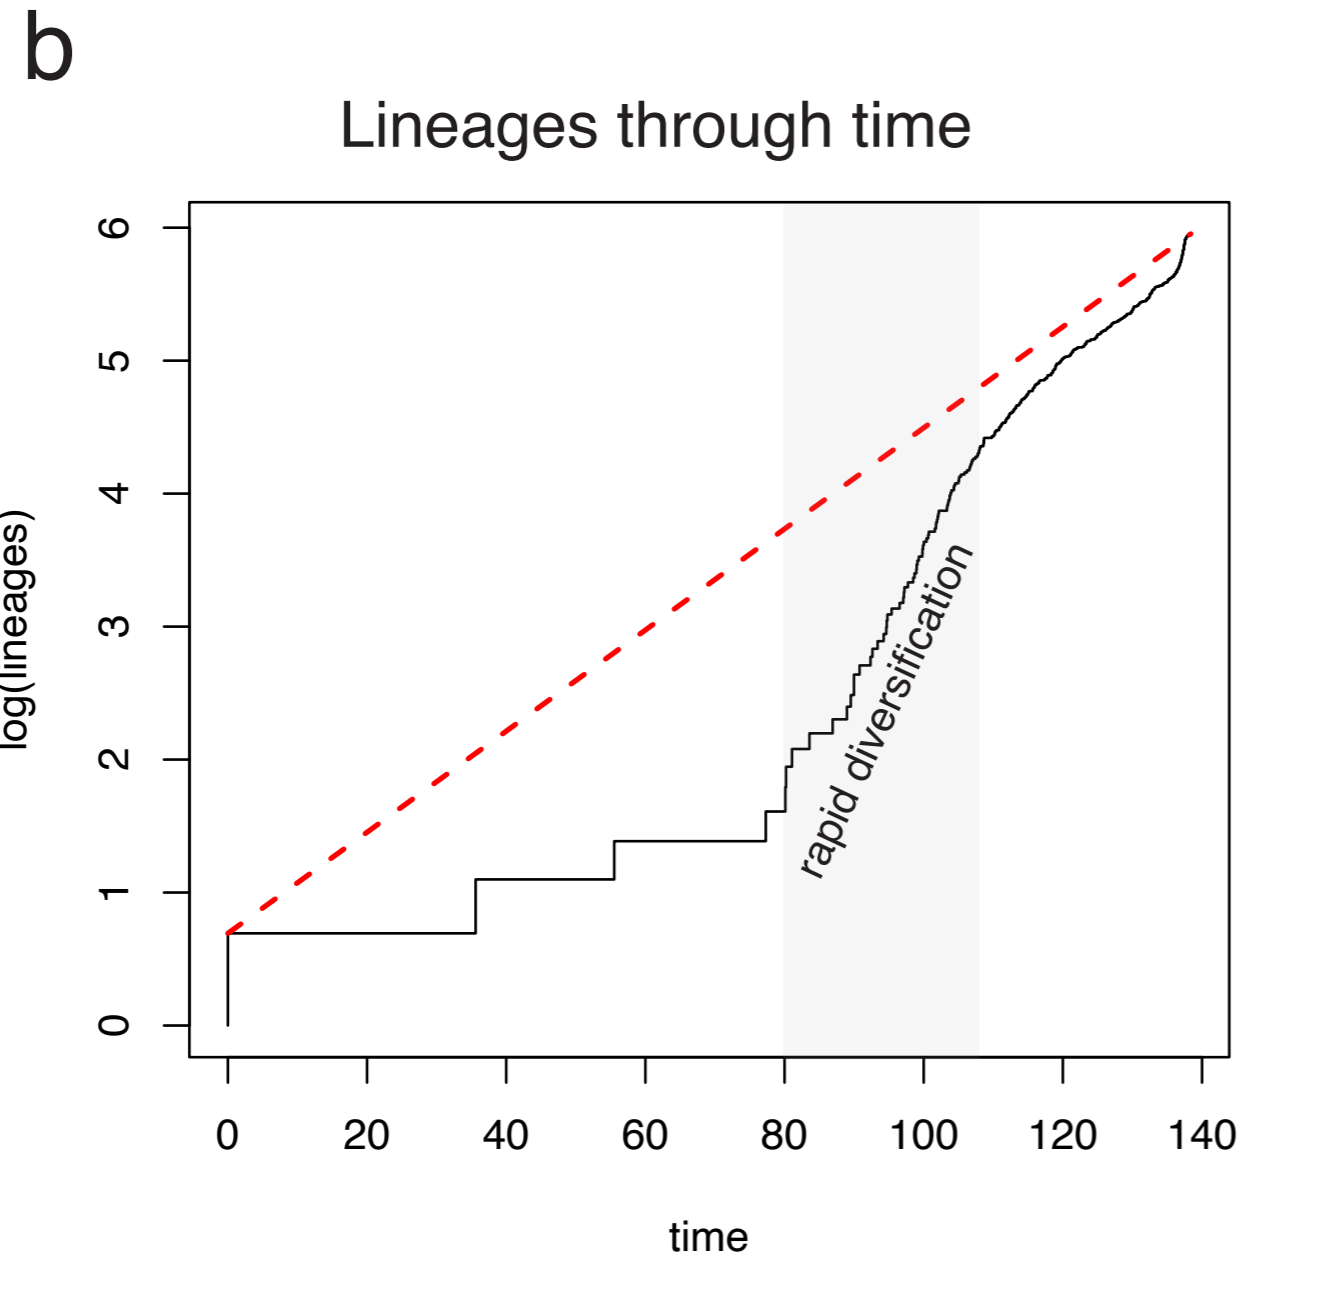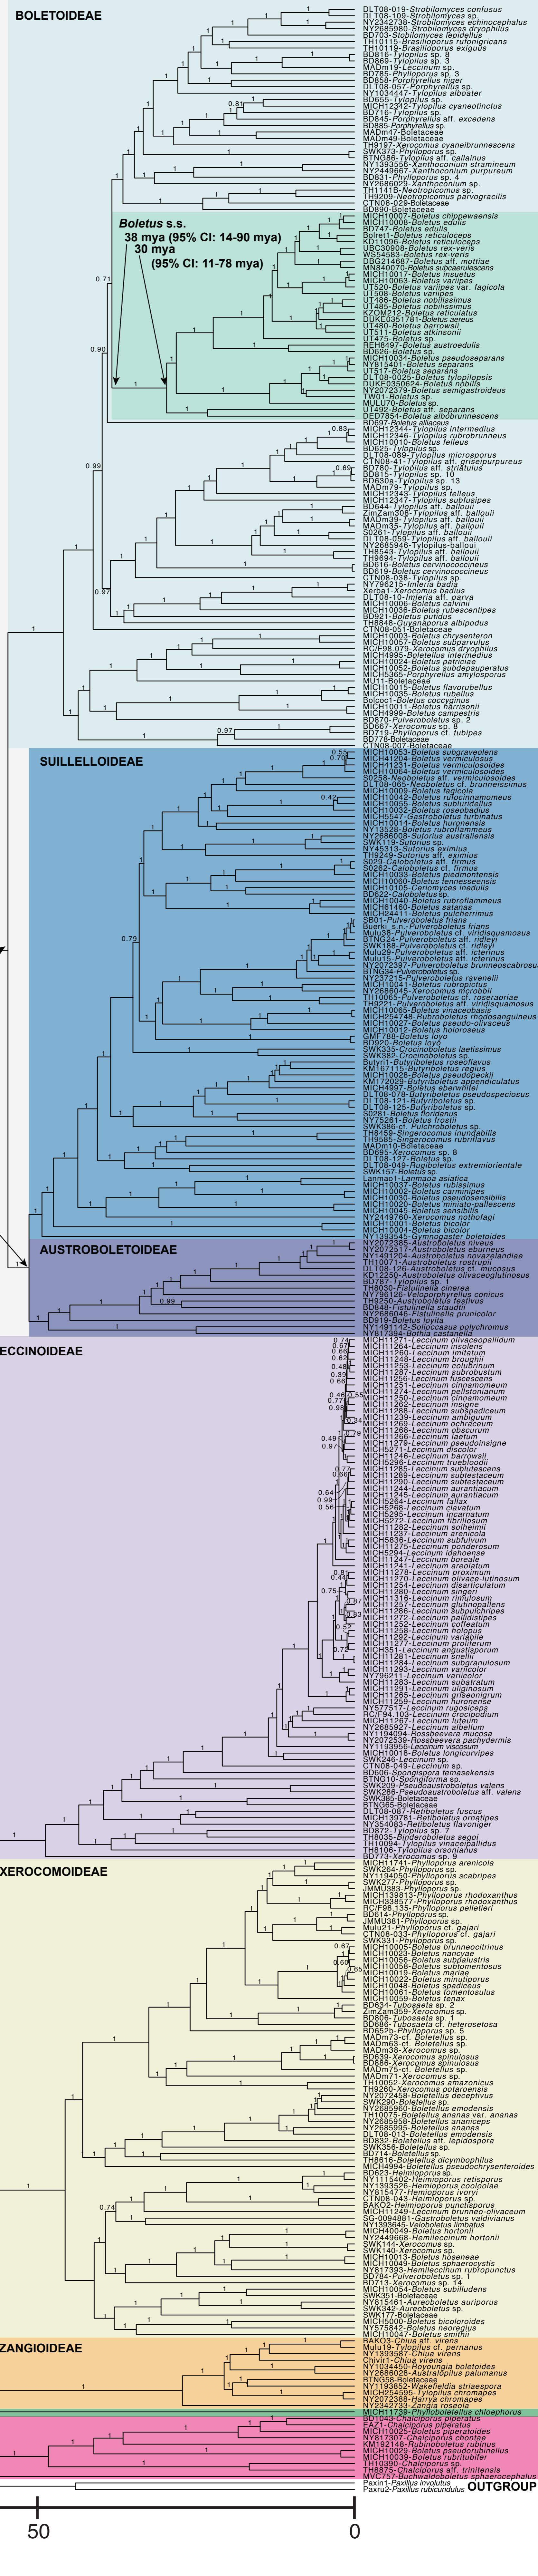

55 mya  
(95% CI: 26-115 mya)

51 mya  
(95% CI: 24-111 mya)

58 mya  
(95% CI: 47-145 mya)

61 mya  
(95% CI: 31-122 mya)

83 mya  
(95% CI: 47-145 mya)

103 mya  
(95% CI: 67-145 mya)

138 mya  
(95% CI: 50-150 mya)

**BOLETACEAE**

57 mya  
(95% CI: 28-117 mya)

**ZANGIOIDEAE**

**PHYLLOBOLETTELLOIDEAE**

**CHALCIPOROIDEAE**

**OUTGROUP**

bioRxiv preprint doi: <https://doi.org/10.1101/2023.10.18.563010>; this version posted October 26, 2023. The copyright holder for this preprint (which was not certified by peer review) is the author/funder. All rights reserved. No reuse allowed without permission.





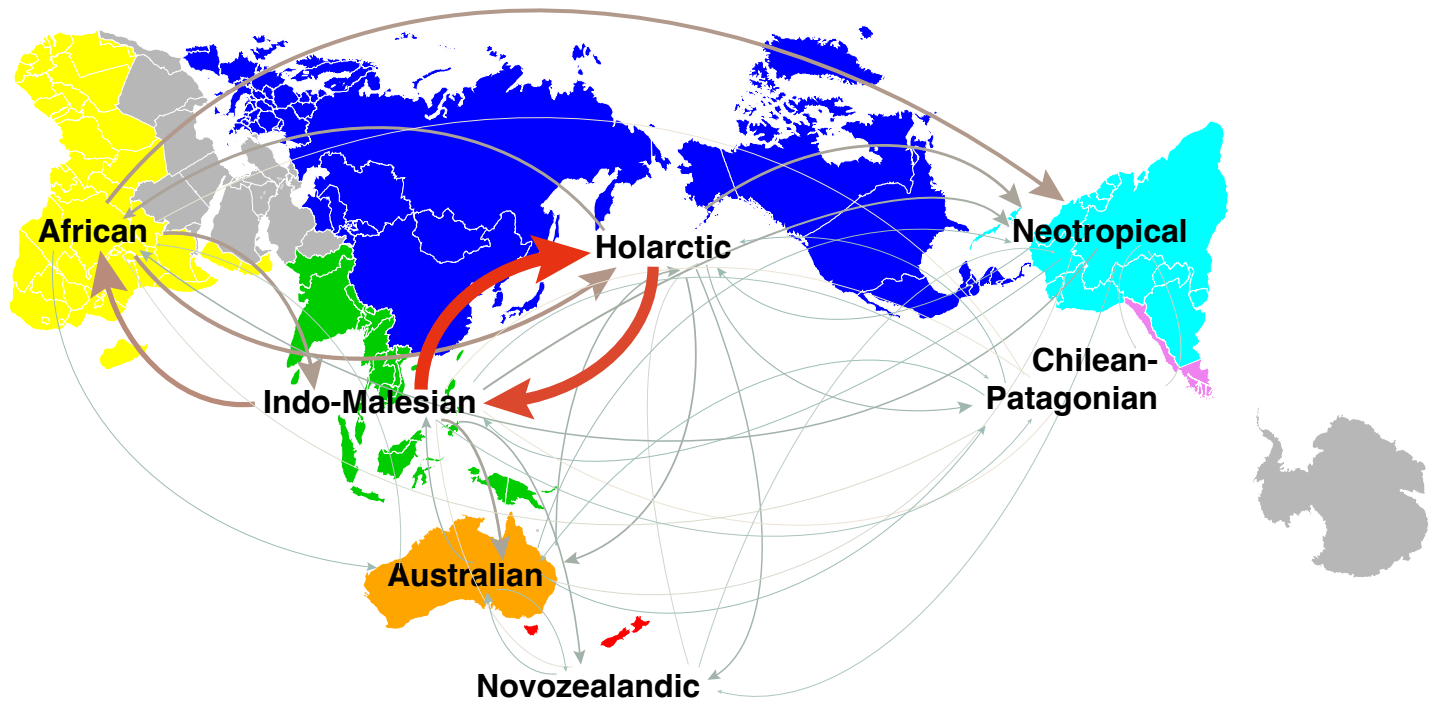

DESTINATION

SOURCE

|                  | Holarctic | Neotropical | Indo-Malesian | African | Australian | Novo-zealandic | Chilean-Patagonian |
|------------------|-----------|-------------|---------------|---------|------------|----------------|--------------------|
| Holarctic        | 0         | 4.28        | 17.42         | 4.66    | 2.72       | 2.22           | 1.76               |
| Neotropical      | 1.26      | 0           | 1.16          | 2.34    | 0.22       | 0.6            | 0.34               |
| Indo-Malesian    | 20.52     | 3.12        | 0             | 8       | 4.32       | 2.54           | 0.64               |
| African          | 6.46      | 6.1         | 5.56          | 0       | 1.24       | 0              | 0.2                |
| Australian       | 2.38      | 1.34        | 2.16          | 0.5     | 0          | 0.66           | 1.06               |
| Novozealandic    | 0.28      | 0.48        | 0.12          | 0       | 1.4        | 0              | 0                  |
| Chile-Patagonian | 0.74      | 0.32        | 0.04          | 0.04    | 0.84       | 0              | 0                  |

A)

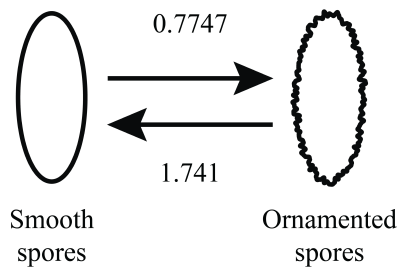

B)

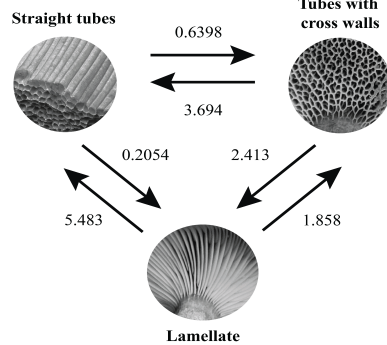

C)

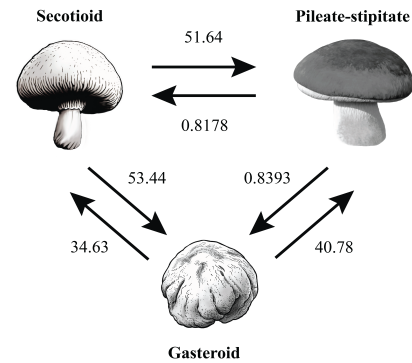

D)

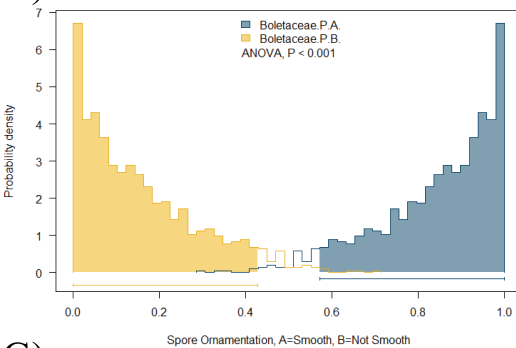

E)

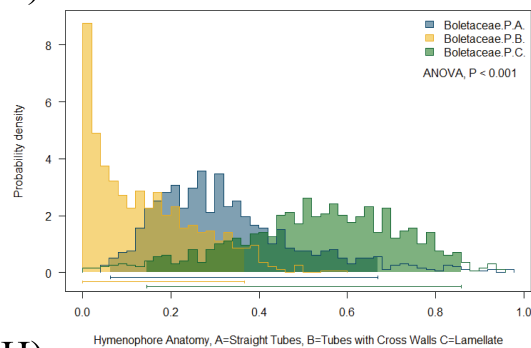

F)

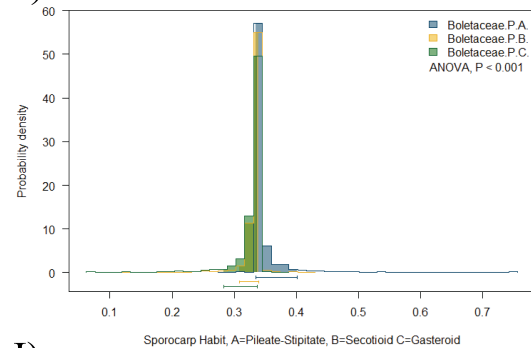

G)

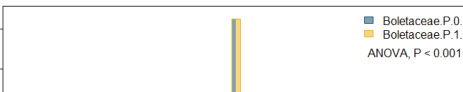

H)

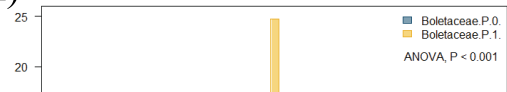

I)

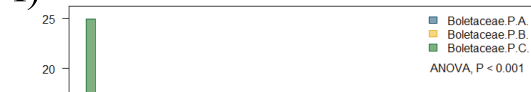

Source: https://www.biorxiv.org/content/biorxiv/early/2023/10/26/2023.10.18.563010.full.pdf
